# Supplementary material for: Material and energy requirements of transport electrification
Source: Royal Society of Chemistry journal article supplement (doi:10.1039/d2ee00802e), 2022-01-01
Supplement: d2ee00802e1.xlsx [file d2ee00802e1.xlsx]

## Sheet: Info
	Info Sheet
	MODEL PARAMETER INPUTS	Description
	Material req. electric batteries	This sheet contains the data of material requirements and intensities per type of EV battery subtechnology
	Material req. battery chargers and grids	This sheet contains the data of material requirements of EV battery chargers and grids
	Material req. railway catenaries	This sheet contains the data of material requirements of railway catenaries
	Material req. additional Cu in EV	This sheet contains the data of copper requirements of electric vehicles appart of the copper in the battery
	Transport materials energy	This sheet contains the data of energy requirements of transport the materials for build EV batteries, chargers and grids.
	EnU	This sheet contains the data of energy embodied requirements of EV batteries, the railway catenaries and chargers and grids.
	MODEL OUTPUTS	Description
	ESOIstatic 4W-car	This sheet contains the data of static ESOI for EV private car per type of EV battery subtechnology
	ESOIstatic Ebus	This sheet contains the data of static ESOI for electric Bus per type of EV battery subtechnology
	ESOIstatic 4W-taxi	This sheet contains the data of static ESOI for EV commercial car (like a taxi) per type of EV battery subtechnology
	ESOIdynamic	This sheet contains the data of dynamic ESOI per type of EV battery subtechnology
	Material Requeriments	This sheet contains the material requeriments results respect the reservas and the resources
		aquí cuidado porque las figuras leen los datos de un excel de tu PC!

## Sheet: EV batteries req & intensities
Material requirements
	LMO			NMC-622			NMC-811			NCA			LFP
	kg/new MW		References and Comments	kg/new MW		References and Comments	kg/new MW		References and Comments	kg/new MW		References and Comments	kg/new MW		References and Comments
	Without taking into account the 10% scrap rate	Taking into account the 10% scrap rate		Without taking into account the 10% scrap rate	Taking into account the 10% scrap rate		Without taking into account the 10% scrap rate	Taking into account the 10% scrap rate		Without taking into account the 10% scrap rate	Taking into account the 10% scrap rate		Without taking into account the 10% scrap rate	Taking into account the 10% scrap rate
Construction phase	General comment: The data obtained from the literature and those established by hypothesis were used to obtain the battery weight per kWh. Then it has been particularized for the normalized battery of 60 kWh/100kW to obtain the result in MJ/MW.
Aluminium (Al)	1396.5	1536.15	[10] From Dunn et al (Dunn et al 2014), I get a weight (%) of Aluminium and cooper of an EV battery	756	831.6	[10] From Dunn et al (Dunn et al 2014), I get a weight (%) of Aluminium and cooper of an EV battery	756	831.6	[10] From Dunn et al (Dunn et al 2014), I get a weight (%) of Aluminium and cooper of an EV battery	759.1	835.01	[10] From Dunn et al (Dunn et al 2014), I get a weight (%) of Aluminium and cooper of an EV battery	939	1032.9	[10] From Dunn et al (Dunn et al 2014), I get a weight (%) of Aluminium and cooper of an EV battery
Copper (Cu)	807.2	887.92	[10] From Dunn et al (Dunn et al 2014), I get a weight (%) of Aluminium and cooper of an EV battery	468	514.8	[10] From Dunn et al (Dunn et al 2014), I get a weight (%) of Aluminium and cooper of an EV battery	468	514.8	[10] From Dunn et al (Dunn et al 2014), I get a weight (%) of Aluminium and cooper of an EV battery	463	509.3	[10] From Dunn et al (Dunn et al 2014), I get a weight (%) of Aluminium and cooper of an EV battery	543	597.3	[10] From Dunn et al (Dunn et al 2014), I get a weight (%) of Aluminium and cooper of an EV battery
Iron (Fe) (iron cast and low-carbon steel)	0	0		0	0		0	0		0	0		486	534.6	[13] From Linda Gaines et al (Linda Gaines et al, 2009), I get the amount of phosphorus and iron from the LFP battery
Lithium (Li)	96	105.6	[11] From Dunn et al (Dunn et al, 2015) I obtain the EnU of some components of the battery in percentage (Lithium and Manganese), then I apply it to the excel and I vary the weight of minerals until it coincides in percentage	78	85.8	[12] From Luis De La Torre Palacios (A.E Rodriguez et al 2019) et al I get the minerals from the cathodes	66	72.6	[12] From Luis De La Torre Palacios (A.E Rodriguez et al 2019) et al I get the minerals from the cathodes	48	52.8	[12] From Luis De La Torre Palacios (A.E Rodriguez et al 2019) et al I get the minerals from the cathodes	61	67.1	[12] From Luis De La Torre Palacios (A.E Rodriguez et al 2019) et al I get the minerals from the cathodes
Manganese (Mn)	1422	1564.2	[11] From Dunn et al (Dunn et al, 2015) I obtain the EnU of some components of the battery in percentage (Lithium and Manganese), then I apply it to the excel and I vary the weight of minerals until it coincides in percentage	120	132	[12] From Luis De La Torre Palacios (A.E Rodriguez et al 2019) et al I get the minerals from the cathodes	60	66	[12] From Luis De La Torre Palacios (A.E Rodriguez et al 2019) et al I get the minerals from the cathodes	0	0		0	0
Nickel (Ni)	0	0		367	403.7	[12] From Luis De La Torre Palacios (A.E Rodriguez et al 2019) et al I get the minerals from the cathodes	451	496.1	[12] From Luis De La Torre Palacios (A.E Rodriguez et al 2019) et al I get the minerals from the cathodes	402	442.2	[12] From Luis De La Torre Palacios (A.E Rodriguez et al 2019) et al I get the minerals from the cathodes	0	0
Cobalt (Co)	0	0		120	132	[12] From Luis De La Torre Palacios (A.E Rodriguez et al 2019) et al I get the minerals from the cathodes	60	66	[12] From Luis De La Torre Palacios (A.E Rodriguez et al 2019) et al I get the minerals from the cathodes	63	69.3	[12] From Luis De La Torre Palacios (A.E Rodriguez et al 2019) et al I get the minerals from the cathodes	0	0
Phosphorus (P)	0	0		0	0		0	0		0	0		270	297	[13] From Linda Gaines et al (Linda Gaines et al, 2009), I get the amount of phosphorus and iron from the LFP battery
Rest (plastics, electronics)	1933.5	2126.85	From the actual batteries, the total weight of the 60 kWh battery is obtained, the weight obtained from the rest of the minerals is subtracted and the weight of the other components is obtained.	915.8	1007.38	From the actual batteries, the total weight of the 60 kWh battery is obtained, the weight obtained from the rest of the minerals is subtracted and the weight of the other components is obtained.	989.5	1088.45	From the actual batteries, the total weight of the 60 kWh battery is obtained, the weight obtained from the rest of the minerals is subtracted and the weight of the other components is obtained.	1168.8	1285.68	From the actual batteries, the total weight of the 60 kWh battery is obtained, the weight obtained from the rest of the minerals is subtracted and the weight of the other components is obtained.	1560.15	1716.17	From the actual batteries, the total weight of the 60 kWh battery is obtained, the weight obtained from the rest of the minerals is subtracted and the weight of the other components is obtained.
Graphite flake (battery grade)	865.8	952.38	[11] From Dunn et al (Dunn et al, 2015) I obtain the EnU of some components of the battery in percentage (Graphite ), then I apply it to the excel and I vary the weight of minerals until it coincides in percentage	442	486.2	[11] From Dunn et al (Dunn et al, 2015) I obtain the EnU of some components of the battery in percentage (Graphite ), then I apply it to the excel and I vary the weight of minerals until it coincides in percentage	442	486.2	[11] From Dunn et al (Dunn et al, 2015) I obtain the EnU of some components of the battery in percentage (Graphite ), then I apply it to the excel and I vary the weight of minerals until it coincides in percentage	385	423.5	[11] From Dunn et al (Dunn et al, 2015) I obtain the EnU of some components of the battery in percentage (Graphite ), then I apply it to the excel and I vary the weight of minerals until it coincides in percentage	524	576.4	[11] From Dunn et al (Dunn et al, 2015) I obtain the EnU of some components of the battery in percentage (Graphite ), then I apply it to the excel and I vary the weight of minerals until it coincides in percentage
Oxygen (O)	829.026	911.929	from the stoichiometry of the battery (LiMn2O4)	333.236	366.56	from the stoichiometry of the battery (LiNi0.6Mn0.2Co0.2O2)	307.582	338.34	from the stoichiometry of the battery (LiNi0.8Mn0.1Co0.1O2)	274.164	301.58	from the stoichiometry of the battery (Al0.05Co0.15LiNi0.8O2)	556.956	612.652	from the stoichiometry of the battery (LiFePO4)
Weight total per MW (kg/MW)	7350.03	8085.03		3600.04	3960.04		3600.08	3960.09		3563.06	3919.37		4940.11	5434.12
MJ/kg	82.5655	82.5655		106.842	106.842		104.119	104.119		101.652	101.652		78.873	78.873
Ev Vehicles examples
	Reference model vehicle: Nissan leaf 1Gen			Reference model vehicle: Hyundai Kona EV, Hyunda ioniQ, opel Ampera-e…			Reference model vehicle: Renault ZOE					Reference model vehicle: Tesla model 3	Reference model vehicle: BYD e6
Capacity battery (kWh)	24		[1] https://www.nissan-techinfo.com/refgh0v/og/FRG/2011-Nissan-LEAF-FRG.pdf	55		An average capacity has been arranged since there are quite a few vehicle models using this type of battery with capacities between 40 and 65 Kwh [2]-[5], also taking advantage of this to make the capacity coincide with that of the nmc-811 battery and thus facilitate the calculations.	55		[4] indicates 52 kWh useful, which correpond to around 55 kWh in reality	80.5		[6] European Tesla 3 version https://www.evspecifications.com/en/model/445a110	85		[7] indicates 80 kWh useful, which in reality correspond to around 85 kWh
Power motor (W)	80000		[1] https://www.nissan-techinfo.com/refgh0v/og/FRG/2011-Nissan-LEAF-FRG.pdf	100000		Typical motor of this EV categorie, like the Renault Zoe. [4]	100000		[4] https://www.evspecifications.com/en/model/d323ad	147000+188000		[6] European Tesla 3 version https://www.evspecifications.com/en/model/445a110	90000		[7] https://en.byd.com/wp-content/uploads/2017/06/e6_cutsheet.pdf
Battery mass (kg)	294		[1]	~330		[4]	~330		[4]	~478		[6]	~700		[8]
	Standarized batteries
Performance factors
Vehicle use in lifetime (km)	200000		Typical value for ICE	200000		Typical value for ICE	200000		Typical value for ICE	200000		Typical value for ICE	200000		Typical value for ICE
Autonomy (km)	420		assuming similar relation capacity-autonomy which hyundai kona [2] and VW ID3 [9]	420		assuming similar relation capacity-autonomy which hyundai kona [2] and VW ID3 [9]	420		assuming similar relation capacity-autonomy which hyundai kona [2] and VW ID3 [9]	420		assuming similar relation capacity-autonomy which hyundai kona [2] and VW ID3 [9]	420		assuming similar relation capacity-autonomy which hyundai kona [2] and VW ID3 [9]
Lifetime battery (years)	10		Typical value from manufacturers guarantees [14], [15]	10		Typical value from manufacturers guarantees [14], [15]	10		Typical value from manufacturers guarantees [14], [15]	10		Typical value from manufacturers guarantees [14], [15]	10		Typical value from manufacturers guarantees [14], [15]
Capacity battery (kWh)	60		it has been established that each battery has a capacity of 60 kWh and 100 kW of power, since a vehicle with these characteristics has a range and power that allows practically a "traditional" use of the vehicle	60		it has been established that each battery has a capacity of 60 kWh and 100 kW of power, since a vehicle with these characteristics has a range and power that allows practically a "traditional" use of the vehicle	60		it has been established that each battery has a capacity of 60 kWh and 100 kW of power, since a vehicle with these characteristics has a range and power that allows practically a "traditional" use of the vehicle	60		it has been established that each battery has a capacity of 60 kWh and 100 kW of power, since a vehicle with these characteristics has a range and power that allows practically a "traditional" use of the vehicle	60		it has been established that each battery has a capacity of 60 kWh and 100 kW of power, since a vehicle with these characteristics has a range and power that allows practically a "traditional" use of the vehicle
Power motor (W)	100000			100000			100000			100000			100000
	Without taking into account the 10% scrap rate	Taking into account the 10% scrap rate		Without taking into account the 10% scrap rate	Taking into account the 10% scrap rate		Without taking into account the 10% scrap rate	Taking into account the 10% scrap rate		Without taking into account the 10% scrap rate	Taking into account the 10% scrap rate		Without taking into account the 10% scrap rate	Taking into account the 10% scrap rate
	LMO			NMC-622			NMC-811			NCA			LFP
EnUs	MJ/MW			MJ/MW			MJ/MW			MJ/MW			MJ/MW
EnU from materials	606858	667544		384635	423099		374838	412321		362193	398412		389641	428605
References
[1] https://www.nissan-techinfo.com/refgh0v/og/FRG/2011-Nissan-LEAF-FRG.pdf
[2] Hyundai, «Hyundai Kona data». https://www.hyundai.co.uk/new-cars/kona-electric
[3] Hyundai, «Hyundai ioniq data». https://www.hyundai.co.uk/new-cars/ioniq/electric
[4] https://www.evspecifications.com/en/model/d323ad
[5] RENAULT, «Renault ZOE data». https://www.renault.co.uk/electric-vehicles/zoe.html
[6] https://www.evspecifications.com/en/model/445a110
[7] https://en.byd.com/wp-content/uploads/2017/06/e6_cutsheet.pdf
[8] https://insideevs.com/news/326110/2016-byd-e6-to-get-increased-range/
[9] Volkswagen, «The ID.3 Brochure and price list», Volkswagen UK. https://www.volkswagen.co.uk/order-a-brochure/id3
[10] Dunn, J B, Gaines, L, Barnes, M, Wang, M, and Sullivan, J. Material and energy flows in the materials production, assembly, and end-of-life stages of the automotive lithium-ion battery life cycle. United States: N. p., 2012. Web. doi:10.2172/1044525.
[11] Dunn, J. B., Gaines, L., Kelly, J. C., James, C., & Gallagher, K. G. (2015). The significance of Li-ion batteries in electric vehicle life-cycle energy and emissions and recycling's role in its reduction. Energy & Environmental Science, 8(1), 158-168.
[12] Protagonismo de las materias primas minerales en el desarrollo del vehículo eléctrico. Luis De La Torre Palacios, Eloy Álvarez Pelegry, José Antonio Espí Rodríguez.
[13] Lithium‐Ion Batteries: Possible Materials Issues. Linda Gaines and Paul Nelson
[14] Volkswagen, «Warranty - Terms and Conditions». https://www.volkswagen.co.uk/owners-and-drivers/my-car/warranties/new-car-terms
[15] Hyundai, «Hyundai 5 Year Warranty Terms and Conditions». [En línea]. Disponible en: https://www.hyundai.co.uk/5-year-warranty/5_year_warranty-terms-and-conditions.pdf
[16] Hammond, G., Jones, C., 2011. Inventory of Carbon & Energy (ICE) Version 2.0. Sustainable Energy Research Team (SERT) Department of Mechanical Engineering University of Bath, UK. https://www.carbonsolutions.com/Resources/ICE%20V2.0%20-%20Jan%202011.xls
[17] Zhai, Pei, Jacqueline A. Isaacs, and Matthew J. Eckelman. "Net energy benefits of carbon nanotube applications." Applied energy 173 (2016): 624-634.

## Sheet: Electric grid & chargers req
	Hypotheses presented: These distances have been established based on experience [64] and observation of existing installations, but these values are subject to much variability depending on where the installation is made.					Hypotheses presented: -Low voltage grids: Data obtained from the technical guide for voltage drop application [6]. -Low-medium voltage grids: Data obtained from the technical guide for voltage drop application [6]. -Medium and high voltage grids: Data have been obtained from the different authors [4], [5]. These data have been gathered seeking a balance between them and a greater accuracy in the …
		m/MW	Comments			Materials	Low voltage grids (kg/m)	Medium-low voltage grids (kg/m)	Medium voltage grids (kg/m)	High voltage grids (kg/m)			Length grid infrastructure connection to EV charge system (m/charger)
	Low-voltage lines for the home charger	400	Assuming 40 m per charger, and given that: 1 charger/battery x 10 batteries/MW=10 home chargers/MW			Copper	0.044	0	0	0		Low voltage lines for the home charger	40
						Aluminium	0	0.173	1.215	1.215		Medium-low voltage lines for a conventional charger	50
	Medium-low voltage lines for a conventional charger	125	Assuming 50 m per charger, and given that: 0.25 chargers/battery x 10 batteries/MW=2.5 fast chargers/MW			Galvanized steel	0	0	0.45	0.45		Medium-high voltage lines for a fast charger (connecting the CT to the charger)	5
						Steel bar	0	0	2.48	2.48		High-voltage lines for a fast charger (linking the delivery centre with the TC)	40
	Medium-high voltage lines for a fast charger (linking the TC to the charger)	7.5	Assuming 5 m per charger (5 chargers are usually found together so the actual distance from the chargers to the TC would be 25 m), and given that: 0.15 chargers/battery x 10 batteries/MW=1.5 fast chargers/MW			Cement	0	0	180	180
	High-voltage lines for a fast charger (linking the distribution center to the TC)	60	Assuming 40 m per charger (5 chargers are usually found together so the actual distance from the chargers to the distribution center would be 200 meters), and given that: 0.15 chargers/battery x 10 batteries/MW=1.5 fast chargers/MW			PVC	0	0	11	11
						Lifetime (years)	40
						Without taking account the 10% scrap rate	Taking account the 10% scrap rate
	Networks for electric vehicle infrastructure	Low-voltage networks (kg/MW)	Medium-low voltage networks (kg/MW)	Medium-high voltage networks (kg/MW)	High voltage networks (kg/MW)	Total Mass (kg/MW)	Total Mass (kg/MW)
	Copper	17.6	0	0	0	17.6	19.36
	Al	0	21.625	9.1125	72.9	103.638	114.001
	Galvanized steel	0	0	3.375	27	30.375	33.4125
	Steel bar	0	0	18.6	148.8	167.4	184.14
	Cement	0	0	1350	10800	12150	13365
	PVC	0	0	82.5	660	742.5	816.75
	Source: Own elaboration with data of, Life Cycle Assessment of Overhead and Underground Primary Power Distribution. S. Bumby, E. Druzhinina, R. Feraldi, D. Werthmann, R. Geyer, y J. Sahl, [4], Especificación técnica de las canalizaciones subterráneas de baja y media tensión. HidroCantábrico distribución eléctrica S.A.U. [5], Guía técnica de aplicación de caída de tensión, Gobierno de España [3], …				TOTAL	13211.5	14532.7
	Hypotheses presented: - All mineral data have been obtained from Lucas et al [2] except for the copper of the fast charger (obtained from [1]) and the iron of this same charger (obtained by establishing the same ratio between the copper weight of Lucas et al [2] and Idtechx [1], that is, taking a 21.05% reduction of material with respect to Lucas et al).
					Without taking account the 10% scrap rate	Taking account the 10% scrap rate
	Material	Home charger (kg/unit) (3.7 kW)	Conventional charger (kg/unit) ( 45 kW)	Fast charger (kg/unit) (200 kW)	Total (Kg/MW) (weighted)	Total (Kg/MW) (weighted)
	Copper	0.7	1.5	120	158.417	174.258
	Iron	0	0	180	225	247.5
	Cement	0	1200	2400	6000	6600
	Stainless steel	3.5	2.14	90	141.183	155.302
	PVC	7.5	0	0	50	55
	ABS, Fiberglass…	0	52.5	380	606.25	666.875
	Lifetime (years)	15	10	12
	Chargers per battery/EV vehicle	1	0.25	0.15
	Source: Own elaboration with data of “Life cycle analysis of energy supply infrastructure for conventional and electric vehicles”. Alexandre Lucas, Carla Alexandra Silva, Rui Costa Neto [2]
References
[1]	F. Ni, «How Important are Electric Vehicles for Future Copper Demand», p. 22.
[2]	A. Lucas, C. Alexandra Silva, y R. Costa Neto, «Life cycle analysis of energy supply infrastructure for conventional and electric vehicles», Energy Policy, vol. 41, pp. 537-547, feb. 2012, doi: 10.1016/j.enpol.2011.11.015.
[3]	D. Pulido Sánchez, «Análisis de los requerimientos materiales de la transición hacia una movilidad eléctrica», info:eu-repo/semantics/bachelorThesis, 2020. [En línea]. Disponible en: http://uvadoc.uva.es/handle/10324/41646
[4]	S. Bumby, E. Druzhinina, R. Feraldi, D. Werthmann, R. Geyer, y J. Sahl, «Life Cycle Assessment of Overhead and Underground Primary Power Distribution», Environ. Sci. Technol., vol. 44, n.o 14, pp. 5587-5593, jul. 2010, doi: 10.1021/es9037879.
[5]	HidroCantábrico distribusión electrica S.A.U., «Especificacion tecnica de las canalizaciones subterraneas de baja y media tensión». [En línea]. Disponible en: https://www.hcenergia.com/recursos/doc/Colaboradores/Proveedores/Electricidad/Ingenieria/2116218461_2772011142751.pdf
[6]	Ministerio de ciencia y tecnología, «Guia tecnica de aplicacion- Caidas de tensión». [En línea]. Disponible en: http://www.f2i2.net/documentos/lsi/rbt/guias/guia_bt_anexo_2_sep03r1.pdf

## Sheet: Railway catenaries req
		Data regarding the electric railroad, catenary and transformers used.
			Composition and embodied energy of copper ETP								Characteristics of catenary model CA-220			Quantity of copper ETP used in the catenaries CA-220
			Composition of copper-PTE (mass percent)	Copper (Cu)	0.999	Silver (Ag)	0.00015	Lead (Pb)	5e-05		Elements	CA-220 Copper-ETP (mm^2)		Double track (m^3/km)	Single track (m^3/km)
			Embodied energy (MJ/kg)	45.45		1306.13		28.53
			Source: INVENTORY OF CARBON & ENERGY. Geoff Hammond & Craig Jones [1] y Cobre-ETP, BRONMETAL [5]								Holder	180		2.4	1.2
											contact wire	300		Source: Own elaboration
			Density of railroad components								Accompanying feeder	240
				Copper (Cu)		Silver (Ag)		Lead (Pb)			Feeder	480
			Density (kg/m^3)	8960		10490		11340			Source: [3] & [4]
			Source: Own elaboration
			To the amounts of copper obtained above we must add the copper present in the traction substations that feed energy to the catenary system [6]. These substations are usually located every 20 kilometers (double track) of railway track and have 2 transformers of 3300 kVa power (with about 1000 kg of copper each) that reduce the voltage of electrical energy from 25 kV to 3 kV.
			Amount of copper used in traction substations									Energy and mass per km needed to electrify railroads using CA-220
			Transformer 3300Kva 3Kv/25Kv	Double track (kg/Km)		Single track (kg/Km)							Without taking account the 10% rate scrap		Taking account the 10% rate scrap
			Copper (Kg)	100		50							Single track	Double track	Single track	Double track
												Components	Amount (kg/Km)	Amount(Kg/km)	Amount (kg/Km)	Amount(Kg/km)
			Source: Own elaboration with data of [6]
												Copper (Cu)	10791.2	21582.5	11870.4	23740.7
												Silver (Ag)	1.62031	3.24062	1.78234	3.56468
												Lead (Pb)	0.540103	1.08021	0.594113	1.18823
												Source: Own elaboration
			[1] C. Jones y G. Hammond, «Embodied energy and carbon - The ICE database». [En línea]. Disponible en: https://www.circularecology.com/embodied-energy-and-carbon-footprint-database.html#.XpWW4cgzZPZ.
			[2] ATS energia, «Vida útil de elementos de transmisión». [En línea]. Disponible en: https://www.cne.cl/wp-content/uploads/2018/04/informe-vida-util-ATS.pdf.
			[3] ADIF, «Modelos de cantenaria de ADIF», ADIF. http://www.adif.es/es_ES/comunicacion_y_prensa/fichas_de_actualidad/ficha_actualidad_00070.shtml.
			[4] ADIF, «Memoria descriptiva CA-220». [En línea]. Disponible en: https://www.seguridadferroviaria.es/recursos_aesf/1DAEAFAF-ADC0-4BFE-8958-4BC6AD3AC4F6/144042/017CA2203kV_2012.pdf.
			[5] BRONMETAL, «Cobre-ETP». [En línea]. Disponible en: https://www.bronmetal.com/datos/noticias/archivo5/cobre_pletina.pdf.
			[6] http://descargas.adif.es/ade/u18/GCN/NormativaTecnica.nsf/v0/113E77113517CD61C1257DAB00627F09/$FILE/ET%2003.359.101.7%20Trafos%20en%20aceite%20CC%20Difusi%C3%B3n.pdf?OpenElement.

## Sheet: Cu additional req
	kg/vehicle	Copper content (reference [1])						Hypotheses presented
	Vehicle parts (excluding battery)	ICE	HEV	PHEV	BEV	Bus HEV & BEV		Private vehicles
	Inverter	0	0.31	0.3	0.31	1		-4-wheeled electric vehicles (H4w BEV) (Car/Cab): This data has been obtained from the reference [1].
	Electric motor	0	5	5	9.9	20		-4-wheeled hybrid vehicles (H4w HEV) (Car/Cab): This data has been obtained from the reference [1].
	High voltage connection	0	5	5	5	11		-2-wheeled electric vehicles (H2w BEV) (Motorcycle): The amount of copper is established by making it proportional to the weight of the 4-wheeled electric vehicle.
	Low voltage connection	18	23	23	23	40		-Single person electric vehicles (SEV): The amount of copper is established by making it proportional to the weight of the 4-wheeled hybrid vehicle.
	Others	5	5	5	5	5		Commercial vehicles
	TOTAL	23	38.31	38.3	43.21	77		-Heavy hybrid vehicles (HV HEV) (Lorry): Due to its similarities with the hybrid bus, the same amount of copper is established.
								-Lightweight electric vehicles (LV BEV) (small truck/van): Due to its similarities with the 4-wheel electric vehicle, the same amount of copper is established.
								-Lightweight hybrid vehicles (LV HEV) (small truck/van): Due to its similarities with the hybrid 4-wheeled private vehicle the same amount of copper is established.
								-Hybrid bus (bus HEV): This data has been obtained from the reference [1].
								-Electric bus (bus BEV): The same ratio in the amount of copper is used between this bus and the hybrid bus as between the 4-wheel electric and the 4-wheel hybrid private vehicle.
		Copper content in relation to the H4w ICE(values estimated from reference [1])
	kg/vehicle	H4w HEV	H4w PHEV	H4w BEV	H2w BEV	Bus HEV	BUS BEV	SEV	HV HEV	LV BEV	LV HEV
	TOTAL	15.31	15.3	20.21	1.1934	54	71.2828	0.4593	54	20.21	15.31
		Copper content in relation to the H4w ICE(taking account 10% scrap rate)
	kg/vehicle	H4w HEV	H4w PHEV	H4w BEV	H2w BEV	Bus HEV	BUS BEV	SEV	HV HEV	LV BEV	LV HEV
	TOTAL	16.841	16.83	22.231	1.31274	59.4	78.4111	0.50523	59.4	22.231	16.841
References
[1] F. Ni, «How Important are Electric Vehicles for Future Copper Demand», p. 22. https://copperalliance.org/trends/how-important-are-electric-vehicles-for-future-copper-demand/

## Sheet: Transport materials energy
TRANSPORT Source for Well to Wheels intensities [1]
Diesel (WTW), ratio WtoW to TtoW	1.18942
Heavy fuel oil, ratio WtoW to TtoW	1.08889
Cargo transport by ship [3]
World average container ship in 2015 (MJ/t·km)	0.2
Used here (MJ/t·km)	0.2
Road transport by truck [3]
Average global freight (diesel) (MJ/t·km)	3.5
Used here (MJ/t·km)	3.5
	ESOIst					ESOIfinal
	LMO	NMC622	NMC811	NCA	LFP	LMO	NMC622	NMC811	NCA	LFP
Total mass of components at construction phase (excluded gravel, rocks, sand, concrete and site preparation) (Kg/MW)	8085.03	3960.04	3960.09	3919.37	5434.12	10551.6	6426.64	6426.69	6385.97	7900.72
Concrete/cement + gravel (for roads, etc.)	0	0	0	0	0	19965	19965	19965	19965	19965
Average transport Km from manufacturing to erection [2]
components by road (Km)	500
road concrete, gravel by road (Km)	250
components by ship (Km)	10000
	ESOIst					ESOIfinal
	LMO	NMC622	NMC811	NCA	LFP	LMO	NMC622	NMC811	NCA	LFP
EnU for transport at GtoE phase MJ/MW (Primary terms)	34436.2	16866.8	16867	16693.6	23145.3	65720.4	48151	48151.2	47977.8	54429.5
References
[1] M. Schmied y W. Knörr, «Calculating GHG emissions for freight forwarding and logistics services in accordance with EN 16258». 2012. [En línea]. Disponible en: https://www.clecat.org/media/CLECAT_Guide_on_Calculating_GHG_emissions_for_freight_forwarding_and_logistics_services.pdf
[2] Z. Kis, N. Pandya, y R. H. E. M. Koppelaar, «Electricity generation technologies: Comparison of materials use, energy return on investment, jobs creation and CO2 emissions reduction», Energy Policy, vol. 120, pp. 144-157, sep. 2018, doi: 10.1016/j.enpol.2018.05.033
[3] S. Teske, Achieving the paris climate agreement goals: global and regional 100% renewable energy scenarios with non-energy GHG pathways for +1.5c and +2c. New York, NY: Springer Berlin Heidelberg, 2018.

## Sheet: EnU
		EV batteries EnU
						Without taking into account the 10% scrap rate					Taking into account the 10% scrap rate
				Current energy consumption per unit of material consumption	Reference	Embodied energy materials & phases LMO	Embodied energy materials & phases NMC622	Embodied energy materials & phases NMC811	Embodied energy materials & phases NCA	Embodied energy materials & phases LFP	Embodied energy materials & phases LMO	Embodied energy materials & phases NMC622	Embodied energy materials & phases NMC811	Embodied energy materials & phases NCA	Embodied energy materials & phases LFP
				MJ/kg		MJ/MW	MJ/MW	MJ/MW	MJ/MW	MJ/MW	MJ/MW	MJ/MW	MJ/MW	MJ/MW	MJ/MW
			Aluminium (Al)	151.85	[2]	212059	114799	114799	115269	142587	233264	126278	126278	126796	156846		Machining Energy (Rate 15%)
			Copper (Cu)	45.45	[2]	36687.2	21270.6	21270.6	21043.4	24679.4	40356	23397.7	23397.7	23147.7	27147.3		Without taking account the 10% rate scrap
			Iron (Fe) (iron cast and low-carbon steel)	18.76	[2]	0	0	0	0	9117.36	0	0	0	0	10029.1		LMO	NMC622	NMC811	NCA	LFP
			Lithium (Li)	853	[2]	81888	66534	56298	40944	52033	90076.8	73187.4	61927.8	45038.4	57236.3		MJ/MW	MJ/MW	MJ/MW	MJ/MW	MJ/MW
			Manganese (Mn)	43.392	[2]	61703.4	5207.04	2603.52	0	0	67873.8	5727.74	2863.87	0	0		91028.8	57695.3	56225.7	54329	58446.1
			Nickel (Ni)	125.73	[2]	0	46142.9	56704.2	50543.5	0	0	50757.2	62374.7	55597.8	0		Taking account the 10% rate scrap
			Cobalt (Co)	224.2	[2]	0	26904	13452	14124.6	0	0	29594.4	14797.2	15537.1	0		LMO	NMC622	NMC811	NCA	LFP
			Phosphorus (P)	0	No data for FePO4 EnU was found, hence the part of the EnU of P is included in the rest "Plastics" following Fig3a of Dunn et al 2015 [1].	0	0	0	0	0	0	0	0	0	0		MJ/MW	MJ/MW	MJ/MW	MJ/MW	MJ/MW
			Rest (plastics, electronics)	80.5	[2]	155647	73721.9	79654.8	94088.4	125592	171211	81094.1	87620.2	103497	138151		100132	63464.8	61848.2	59761.9	64290.8
			Graphite flake (battery grade)	68	[3]	58874.4	30056	30056	26180	35632	64761.8	33061.6	33061.6	28798	39195.2
			Oxygen (O)	0	Embodied energy is zero for metal oxide oxygen.	0	0	0	0	0	0	0	0	0	0
			TOTAL (MJ/MW)			606858	384635	374838	362193	389641	667544	423099	412321	398412	428605
	Electric grid and chargers EnU														Enu of railway catenaries
				Without taking account the 10% rate scrap	Taking account the 10% rate scrap		Without taking account the 10% rate scrap	Taking account the 10% rate scrap		Machining Energy (Rate 15%)						Energy and mass per km needed to electrify railroads using CA-220											Machining Energy (Rate 15%)
			Networks for electric vehicle infrastructure	Total Mass (kg/MW)	Total Mass taking account the 10% rate scrap (kg/MW)	Energy (MJ/kg)	Embodied Energy Total (MJ/MW)	Embodied Energy Total (MJ/MW)		Without taking account the 10% rate scrap	Taking account the 10% rate scrap							Without taking account the 10% rate scrap				Taking account the 10% rate scrap					Without taking account the 10% rate scrap		Taking account the 10% rate scrap
			Copper	17.6	19.36	45.45	799.92	879.912		(MJ/MW)	(MJ/MW)							Single track		Double track		Single track		Double track			Single track	Double track	Single track	Double track
			Al	103.638	114.001	155	16063.8	17670.2		26367.1	29003.8					Components	Energy(MJ/kg)	Amount (kg/Km)	Energy (MJ/km)	Amount(Kg/km)	Energy (MJ/km)	Amount (kg/Km)	Energy (MJ/km)	Amount(Kg/km)	Energy (MJ/km)		Energy (MJ/km)	Energy (MJ/km)	Energy (MJ/km)	Energy (MJ/km)
			Galvanized steel	30.375	33.4125	40	1215	1336.5																			73889.1	147778	81278	162556
			Steel bar	167.4	184.14	25.3	4235.22	4658.74								Copper (Cu)	45.45	10791.2	490462	21582.5	980924	11870.4	539508	23740.7	1.07902e+06
			Cement	12150	13365	0.75	9112.5	10023.8								Silver (Ag)	1306.13	1.62031	2116.33	3.24062	4232.66	1.78234	2327.97	3.56468	4655.93
			PVC	742.5	816.75	77.2	57321	63053.1								Lead (Pb)	28.525	0.540103	15.4064	1.08021	30.8128	0.594113	16.9471	1.18823	33.8941
			TOTAL	13211.5	14532.7		88747.5	97622.2								Source: Own elaboration
														Enu of Cu adittional in the electrified vehicles
			Without taking account the 10% rate scrap	Taking account the 10% rate scrap		Without taking account the 10% rate scrap	Taking account the 10% rate scrap
		Material	Total taking account the 10% rate scrap (Kg/MW) (weighted)	Total taking account the 10% rate scrap (Kg/MW) (weighted)	Energy intensity (MJ/Kg)	Embodied Energy (MJ/MW)	Embodied Energy (MJ/MW)	O&M phase (28% Embodied enegy)	Total embodied for chargers (MJ/MW)	Total embodied for grids to chargers (MJ/MW)	TOTAL embodied energy (MJ/MW)
		Copper	158.417	174.258	45.45	7200.04	7920.04	26806.2	122543	97622.2	220165					Without taking account the 10% rate scrap
		Iron	225	247.5	25.3	5692.5	6261.75								kg/vehicle	H4w HEV	H4w PHEV	H4w BEV	H2w BEV	Bus HEV	BUS BEV	SEV	HV HEV	LV BEV	LV HEV		Machining Energy (H4w HEV) (Rate 15%)
		Cement	6000	6600	0.75	4500	4950								TOTAL	15.31	15.3	20.21	1.1934	54	71.2828	0.4593	54	20.21	15.31		Without taking account the 10% rate scrap		Taking account the 10% rate scrap
		Stainless steel	141.183	155.302	56.7	8005.1	8805.6								Copper (Cu) Energy (MJ/kg)	45.45											Energy (MJ/vehicle)		Energy (MJ/vehicle)
		PVC	50	55	77.2	3860	4246								Energy (MJ/vehicle)	695.84	695.385	918.545	54.24	2454.3	3239.8	20.8752	2454.3	918.545	695.84		104.376		114.814
		ABS, Fiberglass…	606.25	666.875	95.3	57775.6	63553.2
					TOTAL	87033.3	95736.6									Taking account the 10% rate scrap
															kg/vehicle	H4w HEV	H4w PHEV	H4w BEV	H2w BEV	Bus HEV	BUS BEV	SEV	HV HEV	LV BEV	LV HEV		Machining Energy (BUS BEV) (Rate 15%)
															TOTAL	16.841	16.83	22.231	1.31274	59.4	78.4111	0.50523	59.4	22.231	16.841		Without taking account the 10% rate scrap		Taking account the 10% rate scrap
															Copper (Cu) Energy (MJ/kg)	0											Energy (MJ/vehicle)		Energy (MJ/vehicle)
															Energy (MJ/vehicle)	765.423	764.923	1010.4	59.664	2699.73	3563.78	22.9627	2699.73	1010.4	765.423		485.971		534.568
References
[1] Dunn, J. B., Gaines, L., Kelly, J. C., James, C., & Gallagher, K. G. (2015). The significance of Li-ion batteries in electric vehicle life-cycle energy and emissions and recycling's role in its reduction. Energy & Environmental Science, 8(1), 158-168.
[2] Hammond, G., Jones, C., 2011. Inventory of Carbon & Energy (ICE) Version 2.0. Sustainable Energy Research Team (SERT) Department of Mechanical Engineering University of Bath, UK. https://www.carbonsolutions.com/Resources/ICE%20V2.0%20-%20Jan%202011.xls
[3] Zhai, Pei, Jacqueline A. Isaacs, and Matthew J. Eckelman. "Net energy benefits of carbon nanotube applications." Applied energy 173 (2016): 624-634.

## Sheet: ESOIstatic 4W-car
		Mileage (km)
		100000	LMO	NMC 622	NMC 811	NCA	LFP
		Autonomy (km) [1]-[4],[5]	420	420	420	420	420
		Cycles (number of cycles)	274.169	274.169	274.169	274.169	274.169
		Capacity (kWh)	60	60	60	60	60
		Energy spent over lifetime (MJ)	51428.6	51428.6	51428.6	51428.6	51428.6
		Battery wear factor [10]	0.1	0.1	0.1	0.1	0.1
		Operational losses per time (OL) [10],[15] (%/h)	0.014	0.014	0.014	0.014	0.014
		Power (W)	100000	100000	100000	100000	100000
		Average power used (W)	163.079	163.079	163.079	163.079	163.079
		CF (/1)	0.00163079	0.00163079	0.00163079	0.00163079	0.00163079
		Machining energy of EV Batteries (MJ/kWh)	400	400	400	400	400
		Lifetime (years) [8]-[9]	10	10	10	10	10
		g [7]	0.737
		Ratio which represent the energy lost in the auxiliary processes necessary for the operation of the electric vehicle at the reference [15] with respect to total energy obtained from the grid (/1)	0.291
		Ratio which represent the energy lost in the charging process at the reference [15] with respect to total energy obtained from the grid (/1)	0.175
		Energy stored in the battery in relation to the energy coming from the grid in the reference [15] (/1). Used to adapt the loss ratios of the reference to our case.	0.821						Uncertainly analysis (100000 km)
												Ea&ba +10%							Ea&ba -10%							CL +10%							CL -10%
		EnU from Materials (MJ/MW)	607902	385679	375881	363237	390685			607902	385679	375881	363237	390685			607902	385679	375881	363237	390685			607902	385679	375881	363237	390685			607902	385679	375881	363237	390685
		EnU taking account scrap rate (10%) (MJ/MW)	668692	424247	413470	399561	429753			668692	424247	413470	399561	429753			668692	424247	413470	399561	429753			668692	424247	413470	399561	429753			668692	424247	413470	399561	429753
		Machining rate of adittional Cu(15%) (MJ/MW)	1043.76	1043.76	1043.76	1043.76	1043.76			1043.76	1043.76	1043.76	1043.76	1043.76			1043.76	1043.76	1043.76	1043.76	1043.76			1043.76	1043.76	1043.76	1043.76	1043.76			1043.76	1043.76	1043.76	1043.76	1043.76
		Machining energy of EV Batteries (MJ/MW)	240000	240000	240000	240000	240000			240000	240000	240000	240000	240000			240000	240000	240000	240000	240000			240000	240000	240000	240000	240000			240000	240000	240000	240000	240000
		EnU EV batteryTotal and adittional Cu, EnU NEW cap+Mr (MJ/MW)	909736	665290	654513	640604	670797			909736	665290	654513	640604	670797			909736	665290	654513	640604	670797			909736	665290	654513	640604	670797			909736	665290	654513	640604	670797				Performance factors, Method
		O&M (total in lifetime)	0	0	0	0	0			0	0	0	0	0			0	0	0	0	0			0	0	0	0	0			0	0	0	0	0				- Nominal power capacity considered: 1 MW.
		Decommissioning (10% of Const) [11], EnU Decom (MJ/MW)	90973.6	66529	65451.3	64060.4	67079.7			90973.6	66529	65451.3	64060.4	67079.7			90973.6	66529	65451.3	64060.4	67079.7			90973.6	66529	65451.3	64060.4	67079.7			90973.6	66529	65451.3	64060.4	67079.7				- CF: Capacity factor, the ratio between the amount of energy a battery releases with a real use and the maximum energy it can release in the same period.
		Transport of materials (GtoG+GtoE+D) [7],[12]-[14] (ESOIst) (MJ/MW)	34436.2	16866.8	16867	16693.6	23145.3			34436.2	16866.8	16867	16693.6	23145.3			34436.2	16866.8	16867	16693.6	23145.3			34436.2	16866.8	16867	16693.6	23145.3			34436.2	16866.8	16867	16693.6	23145.3
		Transport of materials (GtoG+GtoE+D) [7],[12]-[14] (ESOI final) (MJ/MW)	131441	96302	96302.5	95955.6	108859			131441	96302	96302.5	95955.6	108859			131441	96302	96302.5	95955.6	108859			131441	96302	96302.5	95955.6	108859			131441	96302	96302.5	95955.6	108859				- L: Battery operational life time.
		Lifetime (years)	10	10	10	10	10			10	10	10	10	10			10	10	10	10	10			10	10	10	10	10			10	10	10	10	10				- OL: The coefficient represents the fixed electricity losses of the batteries, it is the energy lost by the self-discharge of the batteries over time.
		Total embodied energy, CradletoGrave (ESOIst) (MJ/MW)	1.03515e+06	748686	736832	721358	761022			1.03515e+06	748686	736832	721358	761022			1.03515e+06	748686	736832	721358	761022			1.03515e+06	748686	736832	721358	761022			1.03515e+06	748686	736832	721358	761022
		Total embodied energy, CradletoGrave (ESOIfinal) (MJ/MW)	1.13215e+06	828122	816267	800620	846736			1.13215e+06	828122	816267	800620	846736			1.13215e+06	828122	816267	800620	846736			1.13215e+06	828122	816267	800620	846736			1.13215e+06	828122	816267	800620	846736				- EaB&E: The energy losses from the energy stored in the batteries to the energy that actually drives and operates the electric vehicle. Also included are other losses such as the energy used to drive and acclimatize the system (battery and electronics). Due to the high variability of this coefficient, an uncertainty analysis will be implemented.
		CF (/1)	0.00163079	0.00163079	0.00163079	0.00163079	0.00163079			0.00163079	0.00163079	0.00163079	0.00163079	0.00163079			0.00163079	0.00163079	0.00163079	0.00163079	0.00163079			0.00163079	0.00163079	0.00163079	0.00163079	0.00163079			0.00163079	0.00163079	0.00163079	0.00163079	0.00163079
		Electricity self-consumption from grid (SC) (/1)	0	0	0	0	0			0	0	0	0	0			0	0	0	0	0			0	0	0	0	0			0	0	0	0	0
		Capacity power (MJ/(year*MW))	31536000	31536000	31536000	31536000	31536000			31536000	31536000	31536000	31536000	31536000			31536000	31536000	31536000	31536000	31536000			31536000	31536000	31536000	31536000	31536000			31536000	31536000	31536000	31536000	31536000				- CL: Ratio used to calculate the losses from the electrical grid to the charger and from this to the battery, in addition to the energy used in its maintenance.
		EaB&E [15] (/1)	0.354446	0.354446	0.354446	0.354446	0.354446			0.454446	0.454446	0.454446	0.454446	0.454446			0.254446	0.254446	0.254446	0.254446	0.254446			0.354446	0.354446	0.354446	0.354446	0.354446			0.354446	0.354446	0.354446	0.354446	0.354446				- g: Coefficient to convert the primary energy used in the denominator into equivalent final energy
		Total lifetime operational losses (OL) [10],[15] (/1)	0.0515088	0.0515088	0.0515088	0.0515088	0.0515088			0.0515088	0.0515088	0.0515088	0.0515088	0.0515088			0.0515088	0.0515088	0.0515088	0.0515088	0.0515088			0.0515088	0.0515088	0.0515088	0.0515088	0.0515088			0.0515088	0.0515088	0.0515088	0.0515088	0.0515088				- EnUNew cap: Primary energy used (joules) for the construction phase of the new installed capacity (cradle to gate). The equation to obtain it is as follows
		Charge losses ratio (CL) [15] (/1)	0.213155	0.213155	0.213155	0.213155	0.213155			0.213155	0.213155	0.213155	0.213155	0.213155			0.213155	0.213155	0.213155	0.213155	0.213155			0.313155	0.313155	0.313155	0.313155	0.313155			0.113155	0.113155	0.113155	0.113155	0.113155				- EnUDecom: Primary energy used (joules) to dismantle the infrastructures that have finished their useful life. 10% of the EnUNew cap is assumed for all technologies that follow [11] due to the lack of relevant global data.
		Energy delivered at consumer phase (MJ)	314898	314898	314898	314898	314898			266119	266119	266119	266119	266119			363678	363678	363678	363678	363678			314898	314898	314898	314898	314898			314898	314898	314898	314898	314898
		Energy delivered at plant phase (MJ)	487795	487795	487795	487795	487795			487795	487795	487795	487795	487795			487795	487795	487795	487795	487795			487795	487795	487795	487795	487795			487795	487795	487795	487795	487795				- EnUG&S: Primary energy used (joules) in the construction and maintenance of the networks, storage and other related infrastructure needed to transport and manage electricity to the point of use.
		Current grids (O&M) [6], EnU G&S (taking account scrap rate) (MJ/MW)	220165	220165	220165	220165	220165			220165	220165	220165	220165	220165			220165	220165	220165	220165	220165			220165	220165	220165	220165	220165			220165	220165	220165	220165	220165
		Machining rate of EV grids (15%) (MJ/MW)	29003.8	29003.8	29003.8	29003.8	29003.8			29003.8	29003.8	29003.8	29003.8	29003.8			29003.8	29003.8	29003.8	29003.8	29003.8			29003.8	29003.8	29003.8	29003.8	29003.8			29003.8	29003.8	29003.8	29003.8	29003.8				- EnUTra: Primary energy used for the transport of the materials (diesel, fuel oil...) [12]-[14], employing the methodology used by De Castro et al [7]
		ESOIst	0.639394	0.884037	0.89826	0.917528	0.869707			0.639394	0.884037	0.89826	0.917528	0.869707			0.639394	0.884037	0.89826	0.917528	0.869707			0.639394	0.884037	0.89826	0.917528	0.869707			0.639394	0.884037	0.89826	0.917528	0.869707				- EnUMr: Primary energy used in the manufacture of batteries, chargers....
		ESOIfinal	0.280656	0.312075	0.315548	0.320251	0.306775			0.237181	0.263733	0.266668	0.270642	0.259254			0.324131	0.360418	0.364428	0.369859	0.354296			0.268963	0.272414	0.275445	0.27955	0.267787			0.293412	0.351737	0.355651	0.360951	0.345763
					Ea&ba +10% & CL +10%							Ea&ba -10% & CL +10%							Ea&ba +10% & CL -10%							Ea&ba -10% & CL -10%
		EnU from Materials (MJ/MW)	607902	385679	375881	363237	390685			607902	385679	375881	363237	390685			607902	385679	375881	363237	390685			607902	385679	375881	363237	390685											Performance factors, Results
		EnU taking account scrap rate (10%) (MJ/MW)	668692	424247	413470	399561	429753			668692	424247	413470	399561	429753			668692	424247	413470	399561	429753			668692	424247	413470	399561	429753											-CF: Based on a 60 kWh battery assuming a cycle range of 420 km and a lifetime of 10 years in which depending on the case between 100,000 km and 200,000 km will be realized. The lifetime energy expenditure for transport is between 51428MJ and 102857 MJ
		Machining energy of EV Batteries (MJ/MW)	240000	240000	240000	240000	240000			240000	240000	240000	240000	240000			240000	240000	240000	240000	240000			240000	240000	240000	240000	240000											-OL: constant electricity operational losses of the batteries by the self-discharge of the batteries set at 0.014% (capacity)/h [15]. The battery consumes 0.014% of the total charge cycle every hour of its life by self-discharge. This translates into cycles of use that have not been used to move the vehicle, which means losses. To find the total loss rate, the cycles lost due to self-discharge ar…
		Machining rate of adittional Cu(15%) (MJ/MW)	1043.76	1043.76	1043.76	1043.76	1043.76			1043.76	1043.76	1043.76	1043.76	1043.76			1043.76	1043.76	1043.76	1043.76	1043.76			1043.76	1043.76	1043.76	1043.76	1043.76
		EnU EV batteryTotal and adittional Cu, EnU NEW cap+Mr (MJ/MW)	909736	665290	654513	640604	670797			909736	665290	654513	640604	670797			909736	665290	654513	640604	670797			909736	665290	654513	640604	670797											- EaB&E: The energy losses from the energy stored in the batteries to the energy that actually drives and operates the electric vehicle, Also included are other losses such as the energy used to drive and acclimatize the system (battery, electronics and the car cabin) [15]. An arc of 10% has been taken in these losses since they depend largely on the geographical area where the vehicle is located.
		O&M (total in lifetime)	0	0	0	0	0			0	0	0	0	0			0	0	0	0	0			0	0	0	0	0
		Decommissioning (10% of Const) [11], EnU Decom (MJ/MW)	90973.6	66529	65451.3	64060.4	67079.7			90973.6	66529	65451.3	64060.4	67079.7			90973.6	66529	65451.3	64060.4	67079.7			90973.6	66529	65451.3	64060.4	67079.7
		Transport of materials (GtoG+GtoE+D) [7],[12]-[14] (ESOIst) (MJ/MW)	34436.2	16866.8	16867	16693.6	23145.3			34436.2	16866.8	16867	16693.6	23145.3			34436.2	16866.8	16867	16693.6	23145.3			34436.2	16866.8	16867	16693.6	23145.3											-CL: We take a value for the charge losses ratio in order to maintain the same ratio between the energy stored over the lifetime and the energy lost in the charging process as the reference [15]. A variation of this coefficient of +- 10% has been taken, since it depends on the losses at the time of the load of the vehicle (type of charger where it is charged and speed of charge).
		Transport of materials (GtoG+GtoE+D) [7],[12]-[14] (ESOI final) (MJ/MW)	131441	96302	96302.5	95955.6	108859			131441	96302	96302.5	95955.6	108859			131441	96302	96302.5	95955.6	108859			131441	96302	96302.5	95955.6	108859											-g: The data of the g coefficient of the batteries has been found in the following bibliographic source [7].
		Lifetime (years)	10	10	10	10	10			10	10	10	10	10			10	10	10	10	10			10	10	10	10	10											-EnUNew cap: Data obtained through the embedded energy of the different minerals and the composition of the batteries (Electric batteries sheet).
		Total embodied energy, CradletoGrave (ESOIst) (MJ/MW)	1.03515e+06	748686	736832	721358	761022			1.03515e+06	748686	736832	721358	761022			1.03515e+06	748686	736832	721358	761022			1.03515e+06	748686	736832	721358	761022											- EnUDecom: final energy used (joules) to dismantle the infrastructures that have finished their useful life. 10% of the EnUNew cap is assumed for all technologies that follow [11] due to the lack of relevant global data.
		Total embodied energy, CradletoGrave (ESOIfinal) (MJ/MW)	1.13215e+06	828122	816267	800620	846736			1.13215e+06	828122	816267	800620	846736			1.13215e+06	828122	816267	800620	846736			1.13215e+06	828122	816267	800620	846736
		CF (/1)	0.00163079	0.00163079	0.00163079	0.00163079	0.00163079			0.00163079	0.00163079	0.00163079	0.00163079	0.00163079			0.00163079	0.00163079	0.00163079	0.00163079	0.00163079			0.00163079	0.00163079	0.00163079	0.00163079	0.00163079											EnUG&S: Results of EnU of chargers and grids sheet. The network data have been obtained from [6]
		Electricity self-consumption from grid (SC) (/1)	0	0	0	0	0			0	0	0	0	0			0	0	0	0	0			0	0	0	0	0
		Capacity power (MJ/(year*MW))	31536000	31536000	31536000	31536000	31536000			31536000	31536000	31536000	31536000	31536000			31536000	31536000	31536000	31536000	31536000			31536000	31536000	31536000	31536000	31536000											-EnUTra: Energy used in transport using the weight of each of the battery components and data from [12]-[14]. The calculations are clearly expressed in transport sheet.
		EaB&E [15] (/1)	0.454446	0.454446	0.454446	0.454446	0.454446			0.254446	0.254446	0.254446	0.254446	0.254446			0.454446	0.454446	0.454446	0.454446	0.454446			0.254446	0.254446	0.254446	0.254446	0.254446											- EnUMr: Primary energy used in the manufacture of batteries is obtained from [16]; an arc between 200 MJ/kWh and 800 MJ/kWh has been taken as an uncertainty analysis trying to represent as well as possible the figure 3 of the reference. For all other elements of the technology, 15% has been taken with respect to their EnU [7]
		Total lifetime operational losses (OL) [10],[15] (/1)	0.0515088	0.0515088	0.0515088	0.0515088	0.0515088			0.0515088	0.0515088	0.0515088	0.0515088	0.0515088			0.0515088	0.0515088	0.0515088	0.0515088	0.0515088			0.0515088	0.0515088	0.0515088	0.0515088	0.0515088
		Charge losses ratio (CL) [15] (/1)	0.313155	0.313155	0.313155	0.313155	0.313155			0.313155	0.313155	0.313155	0.313155	0.313155			0.113155	0.113155	0.113155	0.113155	0.113155			0.113155	0.113155	0.113155	0.113155	0.113155
		Energy delivered at consumer phase (MJ)	266119	266119	266119	266119	266119			363678	363678	363678	363678	363678			266119	266119	266119	266119	266119			363678	363678	363678	363678	363678
		Energy delivered at plant phase (MJ)	487795	487795	487795	487795	487795			487795	487795	487795	487795	487795			487795	487795	487795	487795	487795			487795	487795	487795	487795	487795
		Current grids (O&M) [6], EnU G&S (taking account scrap rate) (MJ/MW)	220165	220165	220165	220165	220165			220165	220165	220165	220165	220165			220165	220165	220165	220165	220165			220165	220165	220165	220165	220165
		Machining rate of EV grids (15%) (MJ/MW)	29003.8	29003.8	29003.8	29003.8	29003.8			29003.8	29003.8	29003.8	29003.8	29003.8			29003.8	29003.8	29003.8	29003.8	29003.8			29003.8	29003.8	29003.8	29003.8	29003.8
		ESOIst	0.639394	0.884037	0.89826	0.917528	0.869707			0.639394	0.884037	0.89826	0.917528	0.869707			0.639394	0.884037	0.89826	0.917528	0.869707			0.639394	0.884037	0.89826	0.917528	0.869707
		ESOIfinal	0.227299	0.230215	0.232777	0.236246	0.226305			0.310627	0.314612	0.318113	0.322854	0.309269			0.247961	0.297251	0.300558	0.305038	0.292202			0.338863	0.406223	0.410743	0.416865	0.399323
				Machining energy EV batteries 800MJ/kWh							Machining energy EV batteries 800MJ/kWh & Ea&ba +10%							Machining energy EV batteries 800MJ/kWh & Ea&ba -10%							Machining energy EV batteries 800MJ/kWh & CL+10%							Machining energy EV batteries 800MJ/kWh & CL-10%
		EnU from Materials (MJ/MW)	607902	385679	375881	363237	390685			607902	385679	375881	363237	390685			607902	385679	375881	363237	390685			607902	385679	375881	363237	390685			607902	385679	375881	363237	390685
		EnU taking account scrap rate (10%) (MJ/MW)	668692	424247	413470	399561	429753			668692	424247	413470	399561	429753			668692	424247	413470	399561	429753			668692	424247	413470	399561	429753			668692	424247	413470	399561	429753
		Machining energy of EV Batteries (MJ/MW)	480000	480000	480000	480000	480000			480000	480000	480000	480000	480000			480000	480000	480000	480000	480000			480000	480000	480000	480000	480000			480000	480000	480000	480000	480000
		Machining rate of adittional Cu(15%) (MJ/MW)	1043.76	1043.76	1043.76	1043.76	1043.76			1043.76	1043.76	1043.76	1043.76	1043.76			1043.76	1043.76	1043.76	1043.76	1043.76			1043.76	1043.76	1043.76	1043.76	1043.76			1043.76	1043.76	1043.76	1043.76	1043.76
		EnU EV batteryTotal and adittional Cu, EnU NEW cap+Mr (MJ/MW)	1.14974e+06	905290	894513	880604	910797			1.14974e+06	905290	894513	880604	910797			1.14974e+06	905290	894513	880604	910797			1.14974e+06	905290	894513	880604	910797			1.14974e+06	905290	894513	880604	910797
		O&M (total in lifetime)	0	0	0	0	0			0	0	0	0	0			0	0	0	0	0			0	0	0	0	0			0	0	0	0	0
		Decommissioning (10% of Const) [11], EnU Decom (MJ/MW)	90973.6	66529	65451.3	64060.4	67079.7			90973.6	66529	65451.3	64060.4	67079.7			90973.6	66529	65451.3	64060.4	67079.7			90973.6	66529	65451.3	64060.4	67079.7			90973.6	66529	65451.3	64060.4	67079.7
		Transport of materials (GtoG+GtoE+D) [7],[12]-[14] (ESOIst) (MJ/MW)	34436.2	16866.8	16867	16693.6	23145.3			34436.2	16866.8	16867	16693.6	23145.3			34436.2	16866.8	16867	16693.6	23145.3			34436.2	16866.8	16867	16693.6	23145.3			34436.2	16866.8	16867	16693.6	23145.3
		Transport of materials (GtoG+GtoE+D) [7],[12]-[14] (ESOI final) (MJ/MW)	131441	96302	96302.5	95955.6	108859			131441	96302	96302.5	95955.6	108859			131441	96302	96302.5	95955.6	108859			131441	96302	96302.5	95955.6	108859			131441	96302	96302.5	95955.6	108859
		Lifetime (years)	10	10	10	10	10			10	10	10	10	10			10	10	10	10	10			10	10	10	10	10			10	10	10	10	10
		Total embodied energy, CradletoGrave (ESOIst) (MJ/MW)	1.27515e+06	988686	976832	961358	1.00102e+06			1.27515e+06	988686	976832	961358	1.00102e+06			1.27515e+06	988686	976832	961358	1.00102e+06			1.27515e+06	988686	976832	961358	1.00102e+06			1.27515e+06	988686	976832	961358	1.00102e+06
		Total embodied energy, CradletoGrave (ESOIfinal) (MJ/MW)	1.37215e+06	1.06812e+06	1.05627e+06	1.04062e+06	1.08674e+06			1.37215e+06	1.06812e+06	1.05627e+06	1.04062e+06	1.08674e+06			1.37215e+06	1.06812e+06	1.05627e+06	1.04062e+06	1.08674e+06			1.37215e+06	1.06812e+06	1.05627e+06	1.04062e+06	1.08674e+06			1.37215e+06	1.06812e+06	1.05627e+06	1.04062e+06	1.08674e+06
		CF (/1)	0.00163079	0.00163079	0.00163079	0.00163079	0.00163079			0.00163079	0.00163079	0.00163079	0.00163079	0.00163079			0.00163079	0.00163079	0.00163079	0.00163079	0.00163079			0.00163079	0.00163079	0.00163079	0.00163079	0.00163079			0.00163079	0.00163079	0.00163079	0.00163079	0.00163079
		Electricity self-consumption from grid (SC) (/1)	0	0	0	0	0			0	0	0	0	0			0	0	0	0	0			0	0	0	0	0			0	0	0	0	0
		Capacity power (MJ/(year*MW))	31536000	31536000	31536000	31536000	31536000			31536000	31536000	31536000	31536000	31536000			31536000	31536000	31536000	31536000	31536000			31536000	31536000	31536000	31536000	31536000			31536000	31536000	31536000	31536000	31536000
		EaB&E [15] (/1)	0.354446	0.354446	0.354446	0.354446	0.354446			0.454446	0.454446	0.454446	0.454446	0.454446			0.254446	0.254446	0.254446	0.254446	0.254446			0.354446	0.354446	0.354446	0.354446	0.354446			0.354446	0.354446	0.354446	0.354446	0.354446
		Total lifetime operational losses (OL) [10],[15] (/1)	0.0515088	0.0515088	0.0515088	0.0515088	0.0515088			0.0515088	0.0515088	0.0515088	0.0515088	0.0515088			0.0515088	0.0515088	0.0515088	0.0515088	0.0515088			0.0515088	0.0515088	0.0515088	0.0515088	0.0515088			0.0515088	0.0515088	0.0515088	0.0515088	0.0515088
		Charge losses ratio (CL) [15] (/1)	0.213155	0.213155	0.213155	0.213155	0.213155			0.213155	0.213155	0.213155	0.213155	0.213155			0.213155	0.213155	0.213155	0.213155	0.213155			0.313155	0.313155	0.313155	0.313155	0.313155			0.113155	0.113155	0.113155	0.113155	0.113155
		Energy delivered at consumer phase (MJ)	314898	314898	314898	314898	314898			266119	266119	266119	266119	266119			363678	363678	363678	363678	363678			314898	314898	314898	314898	314898			314898	314898	314898	314898	314898
		Energy delivered at plant phase (MJ)	487795	487795	487795	487795	487795			487795	487795	487795	487795	487795			487795	487795	487795	487795	487795			487795	487795	487795	487795	487795			487795	487795	487795	487795	487795
		Current grids (O&M) [6], EnU G&S (taking account scrap rate) (MJ/MW)	220165	220165	220165	220165	220165			220165	220165	220165	220165	220165			220165	220165	220165	220165	220165			220165	220165	220165	220165	220165			220165	220165	220165	220165	220165
		Machining rate of EV grids (15%) (MJ/MW)	29003.8	29003.8	29003.8	29003.8	29003.8			29003.8	29003.8	29003.8	29003.8	29003.8			29003.8	29003.8	29003.8	29003.8	29003.8			29003.8	29003.8	29003.8	29003.8	29003.8			29003.8	29003.8	29003.8	29003.8	29003.8
		ESOIst	0.519051	0.66944	0.677564	0.68847	0.661191			0.519051	0.66944	0.677564	0.68847	0.661191			0.519051	0.66944	0.677564	0.68847	0.661191			0.519051	0.66944	0.677564	0.68847	0.661191			0.519051	0.66944	0.677564	0.68847	0.661191
		ESOIfinal	0.242437	0.255218	0.257535	0.26066	0.251662			0.204882	0.215683	0.217642	0.220282	0.212678			0.279992	0.294752	0.297429	0.301037	0.290645			0.233662	0.222782	0.224805	0.227532	0.219678			0.251897	0.287653	0.290265	0.293787	0.283645
				Machining energy EV batteries 800MJ/kWh & Ea&ba +10% & CL +10%							Machining energy EV batteries 800MJ/kWh & Ea&ba -10% & CL +10%							Machining energy EV batteries 800MJ/kWh & Ea&ba +10% & CL -10%							Machining energy EV batteries 800MJ/kWh & Ea&ba -10% & CL -10%
		EnU from Materials (MJ/MW)	607902	385679	375881	363237	390685			607902	385679	375881	363237	390685			607902	385679	375881	363237	390685			607902	385679	375881	363237	390685
		EnU taking account scrap rate (10%) (MJ/MW)	668692	424247	413470	399561	429753			668692	424247	413470	399561	429753			668692	424247	413470	399561	429753			668692	424247	413470	399561	429753
		Machining energy of EV Batteries (MJ/MW)	480000	480000	480000	480000	480000			480000	480000	480000	480000	480000			480000	480000	480000	480000	480000			480000	480000	480000	480000	480000
		Machining rate of adittional Cu(15%) (MJ/MW)	1043.76	1043.76	1043.76	1043.76	1043.76			1043.76	1043.76	1043.76	1043.76	1043.76			1043.76	1043.76	1043.76	1043.76	1043.76			1043.76	1043.76	1043.76	1043.76	1043.76
		EnU EV batteryTotal and adittional Cu, EnU NEW cap+Mr (MJ/MW)	1.14974e+06	905290	894513	880604	910797			1.14974e+06	905290	894513	880604	910797			1.14974e+06	905290	894513	880604	910797			1.14974e+06	905290	894513	880604	910797
		O&M (total in lifetime)	0	0	0	0	0			0	0	0	0	0			0	0	0	0	0			0	0	0	0	0
		Decommissioning (10% of Const) [11], EnU Decom (MJ/MW)	90973.6	66529	65451.3	64060.4	67079.7			90973.6	66529	65451.3	64060.4	67079.7			90973.6	66529	65451.3	64060.4	67079.7			90973.6	66529	65451.3	64060.4	67079.7
		Transport of materials (GtoG+GtoE+D) [7],[12]-[14] (ESOIst) (MJ/MW)	34436.2	16866.8	16867	16693.6	23145.3			34436.2	16866.8	16867	16693.6	23145.3			34436.2	16866.8	16867	16693.6	23145.3			34436.2	16866.8	16867	16693.6	23145.3
		Transport of materials (GtoG+GtoE+D) [7],[12]-[14] (ESOI final) (MJ/MW)	131441	96302	96302.5	95955.6	108859			131441	96302	96302.5	95955.6	108859			131441	96302	96302.5	95955.6	108859			131441	96302	96302.5	95955.6	108859
		Lifetime (years)	10	10	10	10	10			10	10	10	10	10			10	10	10	10	10			10	10	10	10	10
		Total embodied energy, CradletoGrave (ESOIst) (MJ/MW)	1.27515e+06	988686	976832	961358	1.00102e+06			1.27515e+06	988686	976832	961358	1.00102e+06			1.27515e+06	988686	976832	961358	1.00102e+06			1.27515e+06	988686	976832	961358	1.00102e+06
		Total embodied energy, CradletoGrave (ESOIfinal) (MJ/MW)	1.37215e+06	1.06812e+06	1.05627e+06	1.04062e+06	1.08674e+06			1.37215e+06	1.06812e+06	1.05627e+06	1.04062e+06	1.08674e+06			1.37215e+06	1.06812e+06	1.05627e+06	1.04062e+06	1.08674e+06			1.37215e+06	1.06812e+06	1.05627e+06	1.04062e+06	1.08674e+06
		CF (/1)	0.00163079	0.00163079	0.00163079	0.00163079	0.00163079			0.00163079	0.00163079	0.00163079	0.00163079	0.00163079			0.00163079	0.00163079	0.00163079	0.00163079	0.00163079			0.00163079	0.00163079	0.00163079	0.00163079	0.00163079
		Electricity self-consumption from grid (SC) (/1)	0	0	0	0	0			0	0	0	0	0			0	0	0	0	0			0	0	0	0	0
		Capacity power (MJ/(year*MW))	31536000	31536000	31536000	31536000	31536000			31536000	31536000	31536000	31536000	31536000			31536000	31536000	31536000	31536000	31536000			31536000	31536000	31536000	31536000	31536000
		EaB&E [15] (/1)	0.454446	0.454446	0.454446	0.454446	0.454446			0.254446	0.254446	0.254446	0.254446	0.254446			0.454446	0.454446	0.454446	0.454446	0.454446			0.254446	0.254446	0.254446	0.254446	0.254446
		Total lifetime operational losses (OL) [10],[15] (/1)	0.0515088	0.0515088	0.0515088	0.0515088	0.0515088			0.0515088	0.0515088	0.0515088	0.0515088	0.0515088			0.0515088	0.0515088	0.0515088	0.0515088	0.0515088			0.0515088	0.0515088	0.0515088	0.0515088	0.0515088
		Charge losses ratio (CL) [15] (/1)	0.313155	0.313155	0.313155	0.313155	0.313155			0.313155	0.313155	0.313155	0.313155	0.313155			0.113155	0.113155	0.113155	0.113155	0.113155			0.113155	0.113155	0.113155	0.113155	0.113155
		Energy delivered at consumer phase (MJ)	266119	266119	266119	266119	266119			363678	363678	363678	363678	363678			266119	266119	266119	266119	266119			363678	363678	363678	363678	363678
		Energy delivered at plant phase (MJ)	487795	487795	487795	487795	487795			487795	487795	487795	487795	487795			487795	487795	487795	487795	487795			487795	487795	487795	487795	487795
		Current grids (O&M) [6], EnU G&S (taking account scrap rate) (MJ/MW)	220165	220165	220165	220165	220165			220165	220165	220165	220165	220165			220165	220165	220165	220165	220165			220165	220165	220165	220165	220165
		Machining rate of EV grids (15%) (MJ/MW)	29003.8	29003.8	29003.8	29003.8	29003.8			29003.8	29003.8	29003.8	29003.8	29003.8			29003.8	29003.8	29003.8	29003.8	29003.8			29003.8	29003.8	29003.8	29003.8	29003.8
		ESOIst	0.519051	0.66944	0.677564	0.68847	0.661191			0.519051	0.66944	0.677564	0.68847	0.661191			0.519051	0.66944	0.677564	0.68847	0.661191			0.519051	0.66944	0.677564	0.68847	0.661191
		ESOIfinal	0.197466	0.188272	0.189982	0.192286	0.185649			0.269857	0.257292	0.259629	0.262778	0.253707			0.212877	0.243094	0.245302	0.248277	0.239707			0.290917	0.332212	0.335229	0.339296	0.327583
				Machining energy EV batteries 200MJ/kWh							Machining energy EV batteries 200MJ/kWh & Ea&ba +10%							Machining energy EV batteries 200MJ/kWh & Ea&ba -10%							Machining energy EV batteries 200MJ/kWh & CL+10%							Machining energy EV batteries 200MJ/kWh & CL-10%
		EnU from Materials (MJ/MW)	607902	385679	375881	363237	390685			607902	385679	375881	363237	390685			607902	385679	375881	363237	390685			607902	385679	375881	363237	390685			607902	385679	375881	363237	390685
		EnU taking account scrap rate (10%) (MJ/MW)	668692	424247	413470	399561	429753			668692	424247	413470	399561	429753			668692	424247	413470	399561	429753			668692	424247	413470	399561	429753			668692	424247	413470	399561	429753
		Machining energy of EV Batteries (MJ/MW)	120000	120000	120000	120000	120000			120000	120000	120000	120000	120000			120000	120000	120000	120000	120000			120000	120000	120000	120000	120000			120000	120000	120000	120000	120000
		Machining rate of adittional Cu(15%) (MJ/MW)	1043.76	1043.76	1043.76	1043.76	1043.76			1043.76	1043.76	1043.76	1043.76	1043.76			1043.76	1043.76	1043.76	1043.76	1043.76			1043.76	1043.76	1043.76	1043.76	1043.76			1043.76	1043.76	1043.76	1043.76	1043.76
		EnU EV batteryTotal and adittional Cu, EnU NEW cap+Mr (MJ/MW)	789736	545290	534513	520604	550797			789736	545290	534513	520604	550797			789736	545290	534513	520604	550797			789736	545290	534513	520604	550797			789736	545290	534513	520604	550797
		O&M (total in lifetime)	0	0	0	0	0			0	0	0	0	0			0	0	0	0	0			0	0	0	0	0			0	0	0	0	0
		Decommissioning (10% of Const) [11], EnU Decom (MJ/MW)	90973.6	66529	65451.3	64060.4	67079.7			90973.6	66529	65451.3	64060.4	67079.7			90973.6	66529	65451.3	64060.4	67079.7			90973.6	66529	65451.3	64060.4	67079.7			90973.6	66529	65451.3	64060.4	67079.7
		Transport of materials (GtoG+GtoE+D) [7],[12]-[14] (ESOIst) (MJ/MW)	34436.2	16866.8	16867	16693.6	23145.3			34436.2	16866.8	16867	16693.6	23145.3			34436.2	16866.8	16867	16693.6	23145.3			34436.2	16866.8	16867	16693.6	23145.3			34436.2	16866.8	16867	16693.6	23145.3
		Transport of materials (GtoG+GtoE+D) [7],[12]-[14] (ESOI final) (MJ/MW)	131441	96302	96302.5	95955.6	108859			131441	96302	96302.5	95955.6	108859			131441	96302	96302.5	95955.6	108859			131441	96302	96302.5	95955.6	108859			131441	96302	96302.5	95955.6	108859
		Lifetime (years)	10	10	10	10	10			10	10	10	10	10			10	10	10	10	10			10	10	10	10	10			10	10	10	10	10
		Total embodied energy, CradletoGrave (ESOIst) (MJ/MW)	915146	628686	616832	601358	641022			915146	628686	616832	601358	641022			915146	628686	616832	601358	641022			915146	628686	616832	601358	641022			915146	628686	616832	601358	641022
		Total embodied energy, CradletoGrave (ESOIfinal) (MJ/MW)	1.01215e+06	708122	696267	680620	726736			1.01215e+06	708122	696267	680620	726736			1.01215e+06	708122	696267	680620	726736			1.01215e+06	708122	696267	680620	726736			1.01215e+06	708122	696267	680620	726736
		CF (/1)	0.00163079	0.00163079	0.00163079	0.00163079	0.00163079			0.00163079	0.00163079	0.00163079	0.00163079	0.00163079			0.00163079	0.00163079	0.00163079	0.00163079	0.00163079			0.00163079	0.00163079	0.00163079	0.00163079	0.00163079			0.00163079	0.00163079	0.00163079	0.00163079	0.00163079
		Electricity self-consumption from grid (SC) (/1)	0	0	0	0	0			0	0	0	0	0			0	0	0	0	0			0	0	0	0	0			0	0	0	0	0
		Capacity power (MJ/(year*MW))	31536000	31536000	31536000	31536000	31536000			31536000	31536000	31536000	31536000	31536000			31536000	31536000	31536000	31536000	31536000			31536000	31536000	31536000	31536000	31536000			31536000	31536000	31536000	31536000	31536000
		EaB&E [15] (/1)	0.354446	0.354446	0.354446	0.354446	0.354446			0.454446	0.454446	0.454446	0.454446	0.454446			0.254446	0.254446	0.254446	0.254446	0.254446			0.354446	0.354446	0.354446	0.354446	0.354446			0.354446	0.354446	0.354446	0.354446	0.354446
		Total lifetime operational losses (OL) [10],[15] (/1)	0.0515088	0.0515088	0.0515088	0.0515088	0.0515088			0.0515088	0.0515088	0.0515088	0.0515088	0.0515088			0.0515088	0.0515088	0.0515088	0.0515088	0.0515088			0.0515088	0.0515088	0.0515088	0.0515088	0.0515088			0.0515088	0.0515088	0.0515088	0.0515088	0.0515088
		Charge losses ratio (CL) [15] (/1)	0.213155	0.213155	0.213155	0.213155	0.213155			0.213155	0.213155	0.213155	0.213155	0.213155			0.213155	0.213155	0.213155	0.213155	0.213155			0.313155	0.313155	0.313155	0.313155	0.313155			0.113155	0.113155	0.113155	0.113155	0.113155
		Energy delivered at consumer phase (MJ)	314898	314898	314898	314898	314898			266119	266119	266119	266119	266119			363678	363678	363678	363678	363678			314898	314898	314898	314898	314898			314898	314898	314898	314898	314898
		Energy delivered at plant phase (MJ)	487795	487795	487795	487795	487795			487795	487795	487795	487795	487795			487795	487795	487795	487795	487795			487795	487795	487795	487795	487795			487795	487795	487795	487795	487795
		Current grids (O&M) [6], EnU G&S (taking account scrap rate) (MJ/MW)	220165	220165	220165	220165	220165			220165	220165	220165	220165	220165			220165	220165	220165	220165	220165			220165	220165	220165	220165	220165			220165	220165	220165	220165	220165
		Machining rate of EV grids (15%) (MJ/MW)	29003.8	29003.8	29003.8	29003.8	29003.8			29003.8	29003.8	29003.8	29003.8	29003.8			29003.8	29003.8	29003.8	29003.8	29003.8			29003.8	29003.8	29003.8	29003.8	29003.8			29003.8	29003.8	29003.8	29003.8	29003.8
		ESOIst	0.723236	1.05278	1.07301	1.10062	1.03252			0.723236	1.05278	1.07301	1.10062	1.03252			0.723236	1.05278	1.07301	1.10062	1.03252			0.723236	1.05278	1.07301	1.10062	1.03252			0.723236	1.05278	1.07301	1.10062	1.03252
		ESOIfinal	0.304671	0.351195	0.355599	0.361583	0.344497			0.257476	0.296793	0.300514	0.305572	0.291132			0.351866	0.405597	0.410683	0.417594	0.397861			0.29094	0.306562	0.310406	0.315629	0.300715			0.319762	0.395829	0.400792	0.407536	0.388279
				Machining energy EV batteries 200MJ/kWh & Ea&ba +10% & CL +10%							Machining energy EV batteries 200MJ/kWh & Ea&ba -10% & CL +10%							Machining energy EV batteries 200MJ/kWh & Ea&ba +10% & CL -10%							Machining energy EV batteries 200MJ/kWh & Ea&ba -10% & CL -10%
		EnU from Materials (MJ/MW)	607902	385679	375881	363237	390685			607902	385679	375881	363237	390685			607902	385679	375881	363237	390685			607902	385679	375881	363237	390685
		EnU taking account scrap rate (10%) (MJ/MW)	668692	424247	413470	399561	429753			668692	424247	413470	399561	429753			668692	424247	413470	399561	429753			668692	424247	413470	399561	429753
		Machining energy of EV Batteries (MJ/MW)	120000	120000	120000	120000	120000			120000	120000	120000	120000	120000			120000	120000	120000	120000	120000			120000	120000	120000	120000	120000
		Machining rate of adittional Cu(15%) (MJ/MW)	1043.76	1043.76	1043.76	1043.76	1043.76			1043.76	1043.76	1043.76	1043.76	1043.76			1043.76	1043.76	1043.76	1043.76	1043.76			1043.76	1043.76	1043.76	1043.76	1043.76
		EnU EV batteryTotal and adittional Cu, EnU NEW cap+Mr (MJ/MW)	789736	545290	534513	520604	550797			789736	545290	534513	520604	550797			789736	545290	534513	520604	550797			789736	545290	534513	520604	550797
		O&M (total in lifetime)	0	0	0	0	0			0	0	0	0	0			0	0	0	0	0			0	0	0	0	0
		Decommissioning (10% of Const) [11], EnU Decom (MJ/MW)	90973.6	66529	65451.3	64060.4	67079.7			90973.6	66529	65451.3	64060.4	67079.7			90973.6	66529	65451.3	64060.4	67079.7			90973.6	66529	65451.3	64060.4	67079.7
		Transport of materials (GtoG+GtoE+D) [7],[12]-[14] (ESOIst) (MJ/MW)	34436.2	16866.8	16867	16693.6	23145.3			34436.2	16866.8	16867	16693.6	23145.3			34436.2	16866.8	16867	16693.6	23145.3			34436.2	16866.8	16867	16693.6	23145.3
		Transport of materials (GtoG+GtoE+D) [7],[12]-[14] (ESOI final) (MJ/MW)	131441	96302	96302.5	95955.6	108859			131441	96302	96302.5	95955.6	108859			131441	96302	96302.5	95955.6	108859			131441	96302	96302.5	95955.6	108859
		Lifetime (years)	10	10	10	10	10			10	10	10	10	10			10	10	10	10	10			10	10	10	10	10
		Total embodied energy, CradletoGrave (ESOIst) (MJ/MW)	915146	628686	616832	601358	641022			915146	628686	616832	601358	641022			915146	628686	616832	601358	641022			915146	628686	616832	601358	641022
		Total embodied energy, CradletoGrave (ESOIfinal) (MJ/MW)	1.01215e+06	708122	696267	680620	726736			1.01215e+06	708122	696267	680620	726736			1.01215e+06	708122	696267	680620	726736			1.01215e+06	708122	696267	680620	726736
		CF (/1)	0.00163079	0.00163079	0.00163079	0.00163079	0.00163079			0.00163079	0.00163079	0.00163079	0.00163079	0.00163079			0.00163079	0.00163079	0.00163079	0.00163079	0.00163079			0.00163079	0.00163079	0.00163079	0.00163079	0.00163079
		Electricity self-consumption from grid (SC) (/1)	0	0	0	0	0			0	0	0	0	0			0	0	0	0	0			0	0	0	0	0
		Capacity power (MJ/(year*MW))	31536000	31536000	31536000	31536000	31536000			31536000	31536000	31536000	31536000	31536000			31536000	31536000	31536000	31536000	31536000			31536000	31536000	31536000	31536000	31536000
		EaB&E [15] (/1)	0.454446	0.454446	0.454446	0.454446	0.454446			0.254446	0.254446	0.254446	0.254446	0.254446			0.454446	0.454446	0.454446	0.454446	0.454446			0.254446	0.254446	0.254446	0.254446	0.254446
		Total lifetime operational losses (OL) [10],[15] (/1)	0.0515088	0.0515088	0.0515088	0.0515088	0.0515088			0.0515088	0.0515088	0.0515088	0.0515088	0.0515088			0.0515088	0.0515088	0.0515088	0.0515088	0.0515088			0.0515088	0.0515088	0.0515088	0.0515088	0.0515088
		Charge losses ratio (CL) [15] (/1)	0.313155	0.313155	0.313155	0.313155	0.313155			0.313155	0.313155	0.313155	0.313155	0.313155			0.113155	0.113155	0.113155	0.113155	0.113155			0.113155	0.113155	0.113155	0.113155	0.113155
		Energy delivered at consumer phase (MJ)	266119	266119	266119	266119	266119			363678	363678	363678	363678	363678			266119	266119	266119	266119	266119			363678	363678	363678	363678	363678
		Energy delivered at plant phase (MJ)	487795	487795	487795	487795	487795			487795	487795	487795	487795	487795			487795	487795	487795	487795	487795			487795	487795	487795	487795	487795
		Current grids (O&M) [6], EnU G&S (taking account scrap rate) (MJ/MW)	220165	220165	220165	220165	220165			220165	220165	220165	220165	220165			220165	220165	220165	220165	220165			220165	220165	220165	220165	220165
		Machining rate of EV grids (15%) (MJ/MW)	29003.8	29003.8	29003.8	29003.8	29003.8			29003.8	29003.8	29003.8	29003.8	29003.8			29003.8	29003.8	29003.8	29003.8	29003.8			29003.8	29003.8	29003.8	29003.8	29003.8
		ESOIst	0.723236	1.05278	1.07301	1.10062	1.03252			0.723236	1.05278	1.07301	1.10062	1.03252			0.723236	1.05278	1.07301	1.10062	1.03252			0.723236	1.05278	1.07301	1.10062	1.03252
		ESOIfinal	0.245872	0.259074	0.262322	0.266737	0.254132			0.336008	0.35405	0.358489	0.364522	0.347297			0.270229	0.334513	0.338707	0.344407	0.328132			0.369295	0.457145	0.462877	0.470666	0.448425
										EnUMr	EnuNew cap	EnuDecom	EnuG&S	EnUTra (st)	EnUTra (final)
									LMO	240000	909736	90973.6	220165	34436.2	131441
									NMC622	240000	665290	66529	220165	16866.8	96302
									NMC811	240000	654513	65451.3	220165	16867	96302.5
									NCA	240000	640604	64060.4	220165	16693.6	95955.6
									LFP	240000	670797	67079.7	220165	23145.3	108859
																													NMC 622, 4wheeler
References										Mileage (km)	LMO	NMC 622	NMC 811	NCA	LFP														Mileage (km)	50000	100000	150000	200000	250000	300000	350000	400000
[1] https://www.hyundai.com/es/modelos/nuevo-ioniq-electrico/autonomia.html									ESOIst	200000	1.31351	1.81608	1.8453	1.88488	1.78664														ESOIst	0.43	0.88	1.36	1.82	2.29	2.76	3.23	3.7
[2] https://www.hyundai.com/es/modelos/kona-electrico/autonomia.html									ESOIfinal	200000	0.525237	0.642043	0.647659	0.655224	0.633419														ESOIfinal	0.15	0.31	0.48	0.64	0.81	0.97	1.14	1.3
[3] https://www.evspecifications.com/en/model/d323ad									ESOIst	100000	0.639394	0.884037	0.89826	0.917528	0.869707														ESOI (ratio (:1)
[4] RENAULT, «Renault ZOE data». https://www.renault.co.uk/electric-vehicles/zoe.html									ESOIfinal	100000	0.280656	0.312075	0.315548	0.320251	0.306775
[5] https://www.volkswagen.es/es/modelos/id3.html
[6] A. Lucas, C. Alexandra Silva, y R. Costa Neto, «Life cycle analysis of energy supply infrastructure for conventional and electric vehicles», Energy Policy, vol. 41, pp. 537-547, feb. 2012, doi: 10.1016/j.enpol.2011.11.015.
[7] C. de Castro y I. Capellán-Pérez, «Standard, Point of Use, and Extended Energy Return on Energy Invested (ESOI) from Comprehensive Material Requirements of Present Global Wind, Solar, and Hydro Power Technologies», Energies, vol. 13, n.o 12, p. 3036, jun. 2020, doi: 10.3390/en13123036.
[8] Volkswagen, «Warranty - Terms and Conditions». https://www.volkswagen.co.uk/owners-and-drivers/my-car/warranties/new-car-terms
[9] Hyundai, «Hyundai 5 Year Warranty Terms and Conditions». [En línea]. Disponible en: https://www.hyundai.co.uk/5-year-warranty/5_year_warranty-terms-and-conditions.pdf
[10] https://www.geotab.com/fleet-management-solutions/ev-battery-degradation-tool/
[11] E. G. Hertwich et al., «Integrated life-cycle assessment of electricity-supply scenarios confirms global environmental benefit of low-carbon technologies», Proc. Natl. Acad. Sci., vol. 112, n.o 20, pp. 6277-6282, may 2015, doi: 10.1073/pnas.1312753111.
[12] M. Schmied y W. Knörr, «Calculating GHG emissions for freight forwarding and logistics services in accordance with EN 16258». 2012. [En línea]. Disponible en: https://www.clecat.org/media/CLECAT_Guide_on_Calculating_GHG_emissions_for_freight_forwarding_and_logistics_services.pdf
[13] Z. Kis, N. Pandya, y R. H. E. M. Koppelaar, «Electricity generation technologies: Comparison of materials use, energy return on investment, jobs creation and CO2 emissions reduction», Energy Policy, vol. 120, pp. 144-157, sep. 2018, doi: 10.1016/j.enpol.2018.05.033
[14] S. Teske, Achieving the paris climate agreement goals: global and regional 100% renewable energy scenarios with non-energy GHG pathways for +1.5c and +2c. New York, NY: Springer Berlin Heidelberg, 2018.
[15] A. D. Duce et al., «eLCAr: Guidelines for the LCA of electric vehicles», 2013, doi: 10.13140/RG.2.1.2782.8244.
[16] J.Porzio et al. Life‐Cycle Assessment Considerations for Batteries and Battery Materials (2021) DOI:10.1002/aenm.202100771

## Sheet: ESOIstatic Ebus
	URBAN BUS	Mileage (km)
		300000	LMO	NMC 622	NMC 811	NCA	LFP
		Autonomy (km) [1]-[4],[5]	300	300	300	300	300
		Cycles (number of cycles)	1112.26	1112.26	1112.26	1112.26	1112.26
		Capacity (kWh)	350	350	350	350	350
		Energy spent over lifetime (MJ)	1260000	1260000	1260000	1260000	1260000
		Battery wear factor [10]	0.1	0.1	0.1	0.1	0.1
		Operational losses per time (OL) [10],[15] (%/h)	0.014	0.014	0.014	0.014	0.014
		Power (W)	160000	160000	160000	160000	160000
		Average power used (W)	3995.43	3995.43	3995.43	3995.43	3995.43
		CF (/1)	0.0249715	0.0249715	0.0249715	0.0249715	0.0249715
		Machining energy of EV Batteries (MJ/kWh)	400	400	400	400	400
		Lifetime (years) [8]-[9]	10	10	10	10	10
		g [7]	0.737
		Ratio which represent the energy lost in the auxiliary processes necessary for the operation of the electric vehicle at the reference [15] with respect to total energy obtained from the grid (/1)	0.291
		Ratio which represent the energy lost in the charging process at the reference [15] with respect to total energy obtained from the grid (/1)	0.175
		Energy stored in the battery in relation to the energy coming from the grid in the reference [15] (/1). Used to adapt the loss ratios of the reference to our case.	0.821
		Adaptation of materials from car to bus	3.64583						Uncertainly analysis (300000 km)
												Ea&ba +10%							Ea&ba -10%							CL +10%							CL -10%
		EnU from Materials (MJ/MW)	2.21935e+06	1.40916e+06	1.37344e+06	1.32734e+06	1.42741e+06			2.21935e+06	1.40916e+06	1.37344e+06	1.32734e+06	1.42741e+06			2.21935e+06	1.40916e+06	1.37344e+06	1.32734e+06	1.42741e+06			2.21935e+06	1.40916e+06	1.37344e+06	1.32734e+06	1.42741e+06			2.21935e+06	1.40916e+06	1.37344e+06	1.32734e+06	1.42741e+06
		EnU taking account scrap rate (10%) (MJ/MW)	2.44128e+06	1.55007e+06	1.51078e+06	1.46007e+06	1.57015e+06			2.44128e+06	1.55007e+06	1.51078e+06	1.46007e+06	1.57015e+06			2.44128e+06	1.55007e+06	1.51078e+06	1.46007e+06	1.57015e+06			2.44128e+06	1.55007e+06	1.51078e+06	1.46007e+06	1.57015e+06			2.44128e+06	1.55007e+06	1.51078e+06	1.46007e+06	1.57015e+06
		Machining energy of EV Batteries (MJ/MW)	875000	875000	875000	875000	875000			875000	875000	875000	875000	875000			875000	875000	875000	875000	875000			875000	875000	875000	875000	875000			875000	875000	875000	875000	875000
		Machining rate of adittional Cu(15%) (MJ/MW)	26123.8	26123.8	26123.8	26123.8	26123.8			26123.8	26123.8	26123.8	26123.8	26123.8			26123.8	26123.8	26123.8	26123.8	26123.8			26123.8	26123.8	26123.8	26123.8	26123.8			26123.8	26123.8	26123.8	26123.8	26123.8
		EnU EV batteryTotal and adittional Cu, EnU NEW cap+Mr (MJ/MW)	3.34241e+06	2.4512e+06	2.41191e+06	2.3612e+06	2.47127e+06			3.34241e+06	2.4512e+06	2.41191e+06	2.3612e+06	2.47127e+06			3.34241e+06	2.4512e+06	2.41191e+06	2.3612e+06	2.47127e+06			3.34241e+06	2.4512e+06	2.41191e+06	2.3612e+06	2.47127e+06			3.34241e+06	2.4512e+06	2.41191e+06	2.3612e+06	2.47127e+06				Performance factors, Method
		O&M (total in lifetime)	0	0	0	0	0			0	0	0	0	0			0	0	0	0	0			0	0	0	0	0			0	0	0	0	0				- Nominal power capacity considered: 1 MW.
		Decommissioning (10% of Const) [11], EnU Decom (MJ/MW)	334241	245120	241191	236120	247127			334241	245120	241191	236120	247127			334241	245120	241191	236120	247127			334241	245120	241191	236120	247127			334241	245120	241191	236120	247127				- CF: Capacity factor, the ratio between the amount of energy a battery releases with a real use and the maximum energy it can release in the same period.
		Transport of materials (GtoG+GtoE+D) [7],[12]-[14] (ESOIst) (MJ/MW)	125549	61493.6	61494.4	60862.1	84383.8			125549	61493.6	61494.4	60862.1	84383.8			125549	61493.6	61494.4	60862.1	84383.8			125549	61493.6	61494.4	60862.1	84383.8			125549	61493.6	61494.4	60862.1	84383.8
		Transport of materials (GtoG+GtoE+D) [7],[12]-[14] (ESOI final) (MJ/MW)	313666	185556	185557	184293	231336			313666	185556	185557	184293	231336			313666	185556	185557	184293	231336			313666	185556	185557	184293	231336			313666	185556	185557	184293	231336				- L: Battery operational life time.
		Lifetime (years)	10	10	10	10	10			10	10	10	10	10			10	10	10	10	10			10	10	10	10	10			10	10	10	10	10				- OL: The coefficient represents the fixed electricity losses of the batteries, it is the energy lost by the self-discharge of the batteries over time.
		Total embodied energy, CradletoGrave (ESOIst) (MJ/MW)	3.80219e+06	2.75781e+06	2.71459e+06	2.65818e+06	2.80278e+06			3.80219e+06	2.75781e+06	2.71459e+06	2.65818e+06	2.80278e+06			3.80219e+06	2.75781e+06	2.71459e+06	2.65818e+06	2.80278e+06			3.80219e+06	2.75781e+06	2.71459e+06	2.65818e+06	2.80278e+06			3.80219e+06	2.75781e+06	2.71459e+06	2.65818e+06	2.80278e+06
		Total embodied energy, CradletoGrave (ESOIfinal) (MJ/MW)	3.99031e+06	2.88187e+06	2.83865e+06	2.78161e+06	2.94974e+06			3.99031e+06	2.88187e+06	2.83865e+06	2.78161e+06	2.94974e+06			3.99031e+06	2.88187e+06	2.83865e+06	2.78161e+06	2.94974e+06			3.99031e+06	2.88187e+06	2.83865e+06	2.78161e+06	2.94974e+06			3.99031e+06	2.88187e+06	2.83865e+06	2.78161e+06	2.94974e+06				- EaB&E: The energy losses from the energy stored in the batteries to the energy that actually drives and operates the electric vehicle. Also included are other losses such as the energy used to drive and acclimatize the system (battery and electronics). Due to the high variability of this coefficient, an uncertainty analysis will be implemented.
		CF (/1)	0.0249715	0.0249715	0.0249715	0.0249715	0.0249715			0.0249715	0.0249715	0.0249715	0.0249715	0.0249715			0.0249715	0.0249715	0.0249715	0.0249715	0.0249715			0.0249715	0.0249715	0.0249715	0.0249715	0.0249715			0.0249715	0.0249715	0.0249715	0.0249715	0.0249715
		Electricity self-consumption from grid (SC) (/1)	0	0	0	0	0			0	0	0	0	0			0	0	0	0	0			0	0	0	0	0			0	0	0	0	0
		Capacity power (MJ/(year*MW))	31536000	31536000	31536000	31536000	31536000			31536000	31536000	31536000	31536000	31536000			31536000	31536000	31536000	31536000	31536000			31536000	31536000	31536000	31536000	31536000			31536000	31536000	31536000	31536000	31536000				- CL: Ratio used to calculate the losses from the electrical grid to the charger and from this to the battery, in addition to the energy used in its maintenance.
		EaB&E [15] (/1)	0.354446	0.354446	0.354446	0.354446	0.354446			0.454446	0.454446	0.454446	0.454446	0.454446			0.254446	0.254446	0.254446	0.254446	0.254446			0.354446	0.354446	0.354446	0.354446	0.354446			0.354446	0.354446	0.354446	0.354446	0.354446				- g: Coefficient to convert the primary energy used in the denominator into equivalent final energy
		Total lifetime operational losses (OL) [10],[15] (/1)	0.012264	0.012264	0.012264	0.012264	0.012264			0.012264	0.012264	0.012264	0.012264	0.012264			0.012264	0.012264	0.012264	0.012264	0.012264			0.012264	0.012264	0.012264	0.012264	0.012264			0.012264	0.012264	0.012264	0.012264	0.012264				- EnUNew cap: Primary energy used (joules) for the construction phase of the new installed capacity (cradle to gate). The equation to obtain it is as follows
		Charge losses ratio (CL) [15] (/1)	0.213155	0.213155	0.213155	0.213155	0.213155			0.213155	0.213155	0.213155	0.213155	0.213155			0.213155	0.213155	0.213155	0.213155	0.213155			0.313155	0.313155	0.313155	0.313155	0.313155			0.113155	0.113155	0.113155	0.113155	0.113155				- EnUDecom: Primary energy used (joules) to dismantle the infrastructures that have finished their useful life. 10% of the EnUNew cap is assumed for all technologies that follow [11] due to the lack of relevant global data.
		Energy delivered at consumer phase (MJ)	5.02139e+06	5.02139e+06	5.02139e+06	5.02139e+06	5.02139e+06			4.24355e+06	4.24355e+06	4.24355e+06	4.24355e+06	4.24355e+06			5.79923e+06	5.79923e+06	5.79923e+06	5.79923e+06	5.79923e+06			5.02139e+06	5.02139e+06	5.02139e+06	5.02139e+06	5.02139e+06			5.02139e+06	5.02139e+06	5.02139e+06	5.02139e+06	5.02139e+06
		Energy delivered at plant phase (MJ)	7778421	7778421	7778421	7778421	7778421			7778421	7778421	7778421	7778421	7778421			7778421	7778421	7778421	7778421	7778421			7778421	7778421	7778421	7778421	7778421			7778421	7778421	7778421	7778421	7778421				- EnUG&S: Primary energy used (joules) in the construction and maintenance of the networks, storage and other related infrastructure needed to transport and manage electricity to the point of use.
		Current grids (O&M) [6], EnU G&S (taking account scrap rate) (MJ/MW)	220165	220165	220165	220165	220165			220165	220165	220165	220165	220165			220165	220165	220165	220165	220165			220165	220165	220165	220165	220165			220165	220165	220165	220165	220165
		Machining rate of EV grids (15%) (MJ/MW)	29003.8	29003.8	29003.8	29003.8	29003.8			29003.8	29003.8	29003.8	29003.8	29003.8			29003.8	29003.8	29003.8	29003.8	29003.8			29003.8	29003.8	29003.8	29003.8	29003.8			29003.8	29003.8	29003.8	29003.8	29003.8				- EnUTra: Primary energy used for the transport of the materials (diesel, fuel oil...) [12]-[14], employing the methodology used by De Castro et al [7]
		ESOIst	2.77581	3.82701	3.88794	3.97045	3.7656			2.77581	3.82701	3.88794	3.97045	3.7656			2.77581	3.82701	3.88794	3.97045	3.7656			2.77581	3.82701	3.88794	3.97045	3.7656			2.77581	3.82701	3.88794	3.97045	3.7656				- EnUMr: Primary energy used in the manufacture of batteries, chargers....
		ESOIfinal	1.04995	1.26624	1.2765	1.29029	1.25047			0.887307	1.07009	1.07876	1.09041	1.05677			1.21259	1.46239	1.47423	1.49016	1.44418			0.903072	1.0586	1.06576	1.07535	1.04755			1.25389	1.57522	1.59112	1.6126	1.55089
					Ea&ba +10% & CL +10%							Ea&ba -10% & CL +10%							Ea&ba +10% & CL -10%							Ea&ba -10% & CL -10%
		EnU from Materials (MJ/MW)	2.21935e+06	1.40916e+06	1.37344e+06	1.32734e+06	1.42741e+06			2.21935e+06	1.40916e+06	1.37344e+06	1.32734e+06	1.42741e+06			2.21935e+06	1.40916e+06	1.37344e+06	1.32734e+06	1.42741e+06			2.21935e+06	1.40916e+06	1.37344e+06	1.32734e+06	1.42741e+06											Performance factors, Results
		EnU taking account scrap rate (10%) (MJ/MW)	2.44128e+06	1.55007e+06	1.51078e+06	1.46007e+06	1.57015e+06			2.44128e+06	1.55007e+06	1.51078e+06	1.46007e+06	1.57015e+06			2.44128e+06	1.55007e+06	1.51078e+06	1.46007e+06	1.57015e+06			2.44128e+06	1.55007e+06	1.51078e+06	1.46007e+06	1.57015e+06											-CF: Based on a 350 kWh battery assuming a cycle range of 300 km and a lifetime of 10 years in which depending on the case between 300,000 km and 400,000 km will be realized. The lifetime energy expenditure for transport is between 1260000MJ and 1680000 MJ
		Machining energy of EV Batteries (MJ/MW)	875000	875000	875000	875000	875000			875000	875000	875000	875000	875000			875000	875000	875000	875000	875000			875000	875000	875000	875000	875000											-OL: constant electricity operational losses of the batteries by the self-discharge of the batteries set at 0.014% (capacity)/h [15]. The battery consumes 0.014% of the total charge cycle every hour of its life by self-discharge. This translates into cycles of use that have not been used to move the vehicle, which means losses. To find the total loss rate, the cycles lost due to self-discharge ar…
		Machining rate of adittional Cu(15%) (MJ/MW)	26123.8	26123.8	26123.8	26123.8	26123.8			26123.8	26123.8	26123.8	26123.8	26123.8			26123.8	26123.8	26123.8	26123.8	26123.8			26123.8	26123.8	26123.8	26123.8	26123.8
		EnU EV batteryTotal and adittional Cu, EnU NEW cap+Mr (MJ/MW)	3.34241e+06	2.4512e+06	2.41191e+06	2.3612e+06	2.47127e+06			3.34241e+06	2.4512e+06	2.41191e+06	2.3612e+06	2.47127e+06			3.34241e+06	2.4512e+06	2.41191e+06	2.3612e+06	2.47127e+06			3.34241e+06	2.4512e+06	2.41191e+06	2.3612e+06	2.47127e+06											- EaB&E: The energy losses from the energy stored in the batteries to the energy that actually drives and operates the electric vehicle, Also included are other losses such as the energy used to drive and acclimatize the system (battery, electronics and the car cabin) [15]. An arc of 10% has been taken in these losses since they depend largely on the geographical area where the vehicle is located.
		O&M (total in lifetime)	0	0	0	0	0			0	0	0	0	0			0	0	0	0	0			0	0	0	0	0
		Decommissioning (10% of Const) [11], EnU Decom (MJ/MW)	334241	245120	241191	236120	247127			334241	245120	241191	236120	247127			334241	245120	241191	236120	247127			334241	245120	241191	236120	247127
		Transport of materials (GtoG+GtoE+D) [7],[12]-[14] (ESOIst) (MJ/MW)	125549	61493.6	61494.4	60862.1	84383.8			125549	61493.6	61494.4	60862.1	84383.8			125549	61493.6	61494.4	60862.1	84383.8			125549	61493.6	61494.4	60862.1	84383.8											-CL: We take a value for the charge losses ratio in order to maintain the same ratio between the energy stored over the lifetime and the energy lost in the charging process as the reference [15]. A variation of this coefficient of +- 10% has been taken, since it depends on the losses at the time of the load of the vehicle (type of charger where it is charged and speed of charge).
		Transport of materials (GtoG+GtoE+D) [7],[12]-[14] (ESOI final) (MJ/MW)	313666	185556	185557	184293	231336			313666	185556	185557	184293	231336			313666	185556	185557	184293	231336			313666	185556	185557	184293	231336											-g: The data of the g coefficient of the batteries has been found in the following bibliographic source [7].
		Lifetime (years)	10	10	10	10	10			10	10	10	10	10			10	10	10	10	10			10	10	10	10	10											-EnUNew cap: Data obtained through the embedded energy of the different minerals and the composition of the batteries (Electric batteries sheet).
		Total embodied energy, CradletoGrave (ESOIst) (MJ/MW)	3.80219e+06	2.75781e+06	2.71459e+06	2.65818e+06	2.80278e+06			3.80219e+06	2.75781e+06	2.71459e+06	2.65818e+06	2.80278e+06			3.80219e+06	2.75781e+06	2.71459e+06	2.65818e+06	2.80278e+06			3.80219e+06	2.75781e+06	2.71459e+06	2.65818e+06	2.80278e+06											- EnUDecom: final energy used (joules) to dismantle the infrastructures that have finished their useful life. 10% of the EnUNew cap is assumed for all technologies that follow [11] due to the lack of relevant global data.
		Total embodied energy, CradletoGrave (ESOIfinal) (MJ/MW)	3.99031e+06	2.88187e+06	2.83865e+06	2.78161e+06	2.94974e+06			3.99031e+06	2.88187e+06	2.83865e+06	2.78161e+06	2.94974e+06			3.99031e+06	2.88187e+06	2.83865e+06	2.78161e+06	2.94974e+06			3.99031e+06	2.88187e+06	2.83865e+06	2.78161e+06	2.94974e+06
		CF (/1)	0.0249715	0.0249715	0.0249715	0.0249715	0.0249715			0.0249715	0.0249715	0.0249715	0.0249715	0.0249715			0.0249715	0.0249715	0.0249715	0.0249715	0.0249715			0.0249715	0.0249715	0.0249715	0.0249715	0.0249715											EnUG&S: Results of EnU of chargers and grids sheet. The network data have been obtained from [6]
		Electricity self-consumption from grid (SC) (/1)	0	0	0	0	0			0	0	0	0	0			0	0	0	0	0			0	0	0	0	0
		Capacity power (MJ/(year*MW))	31536000	31536000	31536000	31536000	31536000			31536000	31536000	31536000	31536000	31536000			31536000	31536000	31536000	31536000	31536000			31536000	31536000	31536000	31536000	31536000											-EnUTra: Energy used in transport using the weight of each of the battery components and data from [12]-[14]. The calculations are clearly expressed in transport sheet.
		EaB&E [15] (/1)	0.454446	0.454446	0.454446	0.454446	0.454446			0.254446	0.254446	0.254446	0.254446	0.254446			0.454446	0.454446	0.454446	0.454446	0.454446			0.254446	0.254446	0.254446	0.254446	0.254446											- EnUMr: Primary energy used in the manufacture of batteries is obtained from [16]; an arc between 200 MJ/kWh and 800 MJ/kWh has been taken as an uncertainty analysis trying to represent as well as possible the figure 3 of the reference. For all other elements of the technology, 15% has been taken with respect to their EnU [7]
		Total lifetime operational losses (OL) [10],[15] (/1)	0.012264	0.012264	0.012264	0.012264	0.012264			0.012264	0.012264	0.012264	0.012264	0.012264			0.012264	0.012264	0.012264	0.012264	0.012264			0.012264	0.012264	0.012264	0.012264	0.012264
		Charge losses ratio (CL) [15] (/1)	0.313155	0.313155	0.313155	0.313155	0.313155			0.313155	0.313155	0.313155	0.313155	0.313155			0.113155	0.113155	0.113155	0.113155	0.113155			0.113155	0.113155	0.113155	0.113155	0.113155
		Energy delivered at consumer phase (MJ)	4.24355e+06	4.24355e+06	4.24355e+06	4.24355e+06	4.24355e+06			5.79923e+06	5.79923e+06	5.79923e+06	5.79923e+06	5.79923e+06			4.24355e+06	4.24355e+06	4.24355e+06	4.24355e+06	4.24355e+06			5.79923e+06	5.79923e+06	5.79923e+06	5.79923e+06	5.79923e+06
		Energy delivered at plant phase (MJ)	7778421	7778421	7778421	7778421	7778421			7778421	7778421	7778421	7778421	7778421			7778421	7778421	7778421	7778421	7778421			7778421	7778421	7778421	7778421	7778421
		Current grids (O&M) [6], EnU G&S (taking account scrap rate) (MJ/MW)	220165	220165	220165	220165	220165			220165	220165	220165	220165	220165			220165	220165	220165	220165	220165			220165	220165	220165	220165	220165
		Machining rate of EV grids (15%) (MJ/MW)	29003.8	29003.8	29003.8	29003.8	29003.8			29003.8	29003.8	29003.8	29003.8	29003.8			29003.8	29003.8	29003.8	29003.8	29003.8			29003.8	29003.8	29003.8	29003.8	29003.8
		ESOIst	2.77581	3.82701	3.88794	3.97045	3.7656			2.77581	3.82701	3.88794	3.97045	3.7656			2.77581	3.82701	3.88794	3.97045	3.7656			2.77581	3.82701	3.88794	3.97045	3.7656
		ESOIfinal	0.763181	0.894617	0.900665	0.908774	0.885282			1.04296	1.22258	1.23085	1.24193	1.20983			1.05965	1.33121	1.34464	1.3628	1.31064			1.44812	1.81923	1.83759	1.8624	1.79113
				Machining energy EV batteries 800MJ/kWh							Machining energy EV batteries 800MJ/kWh & Ea&ba +10%							Machining energy EV batteries 800MJ/kWh & Ea&ba -10%							Machining energy EV batteries 800MJ/kWh & CL+10%							Machining energy EV batteries 800MJ/kWh & CL-10%
		EnU from Materials (MJ/MW)	2.21935e+06	1.40916e+06	1.37344e+06	1.32734e+06	1.42741e+06			2.21935e+06	1.40916e+06	1.37344e+06	1.32734e+06	1.42741e+06			2.21935e+06	1.40916e+06	1.37344e+06	1.32734e+06	1.42741e+06			2.21935e+06	1.40916e+06	1.37344e+06	1.32734e+06	1.42741e+06			2.21935e+06	1.40916e+06	1.37344e+06	1.32734e+06	1.42741e+06
		EnU taking account scrap rate (10%) (MJ/MW)	2.44128e+06	1.55007e+06	1.51078e+06	1.46007e+06	1.57015e+06			2.44128e+06	1.55007e+06	1.51078e+06	1.46007e+06	1.57015e+06			2.44128e+06	1.55007e+06	1.51078e+06	1.46007e+06	1.57015e+06			2.44128e+06	1.55007e+06	1.51078e+06	1.46007e+06	1.57015e+06			2.44128e+06	1.55007e+06	1.51078e+06	1.46007e+06	1.57015e+06
		Machining energy of EV Batteries (MJ/MW)	1750000	1750000	1750000	1750000	1750000			1750000	1750000	1750000	1750000	1750000			1750000	1750000	1750000	1750000	1750000			1750000	1750000	1750000	1750000	1750000			1750000	1750000	1750000	1750000	1750000
		Machining rate of adittional Cu(15%) (MJ/MW)	26123.8	26123.8	26123.8	26123.8	26123.8			26123.8	26123.8	26123.8	26123.8	26123.8			26123.8	26123.8	26123.8	26123.8	26123.8			26123.8	26123.8	26123.8	26123.8	26123.8			26123.8	26123.8	26123.8	26123.8	26123.8
		EnU EV batteryTotal and adittional Cu, EnU NEW cap+Mr (MJ/MW)	4.21741e+06	3.3262e+06	3.28691e+06	3.2362e+06	3.34627e+06			4.21741e+06	3.3262e+06	3.28691e+06	3.2362e+06	3.34627e+06			4.21741e+06	3.3262e+06	3.28691e+06	3.2362e+06	3.34627e+06			4.21741e+06	3.3262e+06	3.28691e+06	3.2362e+06	3.34627e+06			4.21741e+06	3.3262e+06	3.28691e+06	3.2362e+06	3.34627e+06
		O&M (total in lifetime)	0	0	0	0	0			0	0	0	0	0			0	0	0	0	0			0	0	0	0	0			0	0	0	0	0
		Decommissioning (10% of Const) [11], EnU Decom (MJ/MW)	334241	245120	241191	236120	247127			334241	245120	241191	236120	247127			334241	245120	241191	236120	247127			334241	245120	241191	236120	247127			334241	245120	241191	236120	247127
		Transport of materials (GtoG+GtoE+D) [7],[12]-[14] (ESOIst) (MJ/MW)	125549	61493.6	61494.4	60862.1	84383.8			125549	61493.6	61494.4	60862.1	84383.8			125549	61493.6	61494.4	60862.1	84383.8			125549	61493.6	61494.4	60862.1	84383.8			125549	61493.6	61494.4	60862.1	84383.8
		Transport of materials (GtoG+GtoE+D) [7],[12]-[14] (ESOI final) (MJ/MW)	313666	185556	185557	184293	231336			313666	185556	185557	184293	231336			313666	185556	185557	184293	231336			313666	185556	185557	184293	231336			313666	185556	185557	184293	231336
		Lifetime (years)	10	10	10	10	10			10	10	10	10	10			10	10	10	10	10			10	10	10	10	10			10	10	10	10	10
		Total embodied energy, CradletoGrave (ESOIst) (MJ/MW)	4.67719e+06	3.63281e+06	3.58959e+06	3.53318e+06	3.67778e+06			4.67719e+06	3.63281e+06	3.58959e+06	3.53318e+06	3.67778e+06			4.67719e+06	3.63281e+06	3.58959e+06	3.53318e+06	3.67778e+06			4.67719e+06	3.63281e+06	3.58959e+06	3.53318e+06	3.67778e+06			4.67719e+06	3.63281e+06	3.58959e+06	3.53318e+06	3.67778e+06
		Total embodied energy, CradletoGrave (ESOIfinal) (MJ/MW)	4.86531e+06	3.75687e+06	3.71365e+06	3.65661e+06	3.82474e+06			4.86531e+06	3.75687e+06	3.71365e+06	3.65661e+06	3.82474e+06			4.86531e+06	3.75687e+06	3.71365e+06	3.65661e+06	3.82474e+06			4.86531e+06	3.75687e+06	3.71365e+06	3.65661e+06	3.82474e+06			4.86531e+06	3.75687e+06	3.71365e+06	3.65661e+06	3.82474e+06
		CF (/1)	0.0249715	0.0249715	0.0249715	0.0249715	0.0249715			0.0249715	0.0249715	0.0249715	0.0249715	0.0249715			0.0249715	0.0249715	0.0249715	0.0249715	0.0249715			0.0249715	0.0249715	0.0249715	0.0249715	0.0249715			0.0249715	0.0249715	0.0249715	0.0249715	0.0249715
		Electricity self-consumption from grid (SC) (/1)	0	0	0	0	0			0	0	0	0	0			0	0	0	0	0			0	0	0	0	0			0	0	0	0	0
		Capacity power (MJ/(year*MW))	31536000	31536000	31536000	31536000	31536000			31536000	31536000	31536000	31536000	31536000			31536000	31536000	31536000	31536000	31536000			31536000	31536000	31536000	31536000	31536000			31536000	31536000	31536000	31536000	31536000
		EaB&E [15] (/1)	0.354446	0.354446	0.354446	0.354446	0.354446			0.454446	0.454446	0.454446	0.454446	0.454446			0.254446	0.254446	0.254446	0.254446	0.254446			0.354446	0.354446	0.354446	0.354446	0.354446			0.354446	0.354446	0.354446	0.354446	0.354446
		Total lifetime operational losses (OL) [10],[15] (/1)	0.012264	0.012264	0.012264	0.012264	0.012264			0.012264	0.012264	0.012264	0.012264	0.012264			0.012264	0.012264	0.012264	0.012264	0.012264			0.012264	0.012264	0.012264	0.012264	0.012264			0.012264	0.012264	0.012264	0.012264	0.012264
		Charge losses ratio (CL) [15] (/1)	0.213155	0.213155	0.213155	0.213155	0.213155			0.213155	0.213155	0.213155	0.213155	0.213155			0.213155	0.213155	0.213155	0.213155	0.213155			0.313155	0.313155	0.313155	0.313155	0.313155			0.113155	0.113155	0.113155	0.113155	0.113155
		Energy delivered at consumer phase (MJ)	5.02139e+06	5.02139e+06	5.02139e+06	5.02139e+06	5.02139e+06			4.24355e+06	4.24355e+06	4.24355e+06	4.24355e+06	4.24355e+06			5.79923e+06	5.79923e+06	5.79923e+06	5.79923e+06	5.79923e+06			5.02139e+06	5.02139e+06	5.02139e+06	5.02139e+06	5.02139e+06			5.02139e+06	5.02139e+06	5.02139e+06	5.02139e+06	5.02139e+06
		Energy delivered at plant phase (MJ)	7778421	7778421	7778421	7778421	7778421			7778421	7778421	7778421	7778421	7778421			7778421	7778421	7778421	7778421	7778421			7778421	7778421	7778421	7778421	7778421			7778421	7778421	7778421	7778421	7778421
		Current grids (O&M) [6], EnU G&S (taking account scrap rate) (MJ/MW)	220165	220165	220165	220165	220165			220165	220165	220165	220165	220165			220165	220165	220165	220165	220165			220165	220165	220165	220165	220165			220165	220165	220165	220165	220165
		Machining rate of EV grids (15%) (MJ/MW)	29003.8	29003.8	29003.8	29003.8	29003.8			29003.8	29003.8	29003.8	29003.8	29003.8			29003.8	29003.8	29003.8	29003.8	29003.8			29003.8	29003.8	29003.8	29003.8	29003.8			29003.8	29003.8	29003.8	29003.8	29003.8
		ESOIst	2.25652	2.90523	2.94021	2.98716	2.86971			2.25652	2.90523	2.94021	2.98716	2.86971			2.25652	2.90523	2.94021	2.98716	2.86971			2.25652	2.90523	2.94021	2.98716	2.86971			2.25652	2.90523	2.94021	2.98716	2.86971
		ESOIfinal	0.925197	1.08913	1.09671	1.10687	1.07744			0.781878	0.920418	0.926821	0.935411	0.91054			1.06851	1.25784	1.26659	1.27833	1.24434			0.809221	0.931906	0.937448	0.944864	0.923336			1.07998	1.31017	1.32115	1.33593	1.2933
				Machining energy EV batteries 800MJ/kWh & Ea&ba +10% & CL +10%							Machining energy EV batteries 800MJ/kWh & Ea&ba -10% & CL +10%							Machining energy EV batteries 800MJ/kWh & Ea&ba +10% & CL -10%							Machining energy EV batteries 800MJ/kWh & Ea&ba -10% & CL -10%
		EnU from Materials (MJ/MW)	2.21935e+06	1.40916e+06	1.37344e+06	1.32734e+06	1.42741e+06			2.21935e+06	1.40916e+06	1.37344e+06	1.32734e+06	1.42741e+06			2.21935e+06	1.40916e+06	1.37344e+06	1.32734e+06	1.42741e+06			2.21935e+06	1.40916e+06	1.37344e+06	1.32734e+06	1.42741e+06
		EnU taking account scrap rate (10%) (MJ/MW)	2.44128e+06	1.55007e+06	1.51078e+06	1.46007e+06	1.57015e+06			2.44128e+06	1.55007e+06	1.51078e+06	1.46007e+06	1.57015e+06			2.44128e+06	1.55007e+06	1.51078e+06	1.46007e+06	1.57015e+06			2.44128e+06	1.55007e+06	1.51078e+06	1.46007e+06	1.57015e+06
		Machining energy of EV Batteries (MJ/MW)	1750000	1750000	1750000	1750000	1750000			1750000	1750000	1750000	1750000	1750000			1750000	1750000	1750000	1750000	1750000			1750000	1750000	1750000	1750000	1750000
		Machining rate of adittional Cu(15%) (MJ/MW)	26123.8	26123.8	26123.8	26123.8	26123.8			26123.8	26123.8	26123.8	26123.8	26123.8			26123.8	26123.8	26123.8	26123.8	26123.8			26123.8	26123.8	26123.8	26123.8	26123.8
		EnU EV batteryTotal and adittional Cu, EnU NEW cap+Mr (MJ/MW)	4.21741e+06	3.3262e+06	3.28691e+06	3.2362e+06	3.34627e+06			4.21741e+06	3.3262e+06	3.28691e+06	3.2362e+06	3.34627e+06			4.21741e+06	3.3262e+06	3.28691e+06	3.2362e+06	3.34627e+06			4.21741e+06	3.3262e+06	3.28691e+06	3.2362e+06	3.34627e+06
		O&M (total in lifetime)	0	0	0	0	0			0	0	0	0	0			0	0	0	0	0			0	0	0	0	0
		Decommissioning (10% of Const) [11], EnU Decom (MJ/MW)	334241	245120	241191	236120	247127			334241	245120	241191	236120	247127			334241	245120	241191	236120	247127			334241	245120	241191	236120	247127
		Transport of materials (GtoG+GtoE+D) [7],[12]-[14] (ESOIst) (MJ/MW)	125549	61493.6	61494.4	60862.1	84383.8			125549	61493.6	61494.4	60862.1	84383.8			125549	61493.6	61494.4	60862.1	84383.8			125549	61493.6	61494.4	60862.1	84383.8
		Transport of materials (GtoG+GtoE+D) [7],[12]-[14] (ESOI final) (MJ/MW)	313666	185556	185557	184293	231336			313666	185556	185557	184293	231336			313666	185556	185557	184293	231336			313666	185556	185557	184293	231336
		Lifetime (years)	10	10	10	10	10			10	10	10	10	10			10	10	10	10	10			10	10	10	10	10
		Total embodied energy, CradletoGrave (ESOIst) (MJ/MW)	4.67719e+06	3.63281e+06	3.58959e+06	3.53318e+06	3.67778e+06			4.67719e+06	3.63281e+06	3.58959e+06	3.53318e+06	3.67778e+06			4.67719e+06	3.63281e+06	3.58959e+06	3.53318e+06	3.67778e+06			4.67719e+06	3.63281e+06	3.58959e+06	3.53318e+06	3.67778e+06
		Total embodied energy, CradletoGrave (ESOIfinal) (MJ/MW)	4.86531e+06	3.75687e+06	3.71365e+06	3.65661e+06	3.82474e+06			4.86531e+06	3.75687e+06	3.71365e+06	3.65661e+06	3.82474e+06			4.86531e+06	3.75687e+06	3.71365e+06	3.65661e+06	3.82474e+06			4.86531e+06	3.75687e+06	3.71365e+06	3.65661e+06	3.82474e+06
		CF (/1)	0.0249715	0.0249715	0.0249715	0.0249715	0.0249715			0.0249715	0.0249715	0.0249715	0.0249715	0.0249715			0.0249715	0.0249715	0.0249715	0.0249715	0.0249715			0.0249715	0.0249715	0.0249715	0.0249715	0.0249715
		Electricity self-consumption from grid (SC) (/1)	0	0	0	0	0			0	0	0	0	0			0	0	0	0	0			0	0	0	0	0
		Capacity power (MJ/(year*MW))	31536000	31536000	31536000	31536000	31536000			31536000	31536000	31536000	31536000	31536000			31536000	31536000	31536000	31536000	31536000			31536000	31536000	31536000	31536000	31536000
		EaB&E [15] (/1)	0.454446	0.454446	0.454446	0.454446	0.454446			0.254446	0.254446	0.254446	0.254446	0.254446			0.454446	0.454446	0.454446	0.454446	0.454446			0.254446	0.254446	0.254446	0.254446	0.254446
		Total lifetime operational losses (OL) [10],[15] (/1)	0.012264	0.012264	0.012264	0.012264	0.012264			0.012264	0.012264	0.012264	0.012264	0.012264			0.012264	0.012264	0.012264	0.012264	0.012264			0.012264	0.012264	0.012264	0.012264	0.012264
		Charge losses ratio (CL) [15] (/1)	0.313155	0.313155	0.313155	0.313155	0.313155			0.313155	0.313155	0.313155	0.313155	0.313155			0.113155	0.113155	0.113155	0.113155	0.113155			0.113155	0.113155	0.113155	0.113155	0.113155
		Energy delivered at consumer phase (MJ)	4.24355e+06	4.24355e+06	4.24355e+06	4.24355e+06	4.24355e+06			5.79923e+06	5.79923e+06	5.79923e+06	5.79923e+06	5.79923e+06			4.24355e+06	4.24355e+06	4.24355e+06	4.24355e+06	4.24355e+06			5.79923e+06	5.79923e+06	5.79923e+06	5.79923e+06	5.79923e+06
		Energy delivered at plant phase (MJ)	7778421	7778421	7778421	7778421	7778421			7778421	7778421	7778421	7778421	7778421			7778421	7778421	7778421	7778421	7778421			7778421	7778421	7778421	7778421	7778421
		Current grids (O&M) [6], EnU G&S (taking account scrap rate) (MJ/MW)	220165	220165	220165	220165	220165			220165	220165	220165	220165	220165			220165	220165	220165	220165	220165			220165	220165	220165	220165	220165
		Machining rate of EV grids (15%) (MJ/MW)	29003.8	29003.8	29003.8	29003.8	29003.8			29003.8	29003.8	29003.8	29003.8	29003.8			29003.8	29003.8	29003.8	29003.8	29003.8			29003.8	29003.8	29003.8	29003.8	29003.8
		ESOIst	2.25652	2.90523	2.94021	2.98716	2.86971			2.25652	2.90523	2.94021	2.98716	2.86971			2.25652	2.90523	2.94021	2.98716	2.86971			2.25652	2.90523	2.94021	2.98716	2.86971
		ESOIfinal	0.683868	0.787549	0.792232	0.798499	0.780306			0.934573	1.07626	1.08266	1.09123	1.06637			0.912682	1.10722	1.1165	1.12899	1.09296			1.24727	1.51313	1.52581	1.54287	1.49363
				Machining energy EV batteries 200MJ/kWh							Machining energy EV batteries 200MJ/kWh & Ea&ba +10%							Machining energy EV batteries 200MJ/kWh & Ea&ba -10%							Machining energy EV batteries 200MJ/kWh & CL+10%							Machining energy EV batteries 200MJ/kWh & CL-10%
		EnU from Materials (MJ/MW)	2.21935e+06	1.40916e+06	1.37344e+06	1.32734e+06	1.42741e+06			2.21935e+06	1.40916e+06	1.37344e+06	1.32734e+06	1.42741e+06			2.21935e+06	1.40916e+06	1.37344e+06	1.32734e+06	1.42741e+06			2.21935e+06	1.40916e+06	1.37344e+06	1.32734e+06	1.42741e+06			2.21935e+06	1.40916e+06	1.37344e+06	1.32734e+06	1.42741e+06
		EnU taking account scrap rate (10%) (MJ/MW)	2.44128e+06	1.55007e+06	1.51078e+06	1.46007e+06	1.57015e+06			2.44128e+06	1.55007e+06	1.51078e+06	1.46007e+06	1.57015e+06			2.44128e+06	1.55007e+06	1.51078e+06	1.46007e+06	1.57015e+06			2.44128e+06	1.55007e+06	1.51078e+06	1.46007e+06	1.57015e+06			2.44128e+06	1.55007e+06	1.51078e+06	1.46007e+06	1.57015e+06
		Machining energy of EV Batteries (MJ/MW)	437500	437500	437500	437500	437500			437500	437500	437500	437500	437500			437500	437500	437500	437500	437500			437500	437500	437500	437500	437500			437500	437500	437500	437500	437500
		Machining rate of adittional Cu(15%) (MJ/MW)	26123.8	26123.8	26123.8	26123.8	26123.8			26123.8	26123.8	26123.8	26123.8	26123.8			26123.8	26123.8	26123.8	26123.8	26123.8			26123.8	26123.8	26123.8	26123.8	26123.8			26123.8	26123.8	26123.8	26123.8	26123.8
		EnU EV batteryTotal and adittional Cu, EnU NEW cap+Mr (MJ/MW)	2.90491e+06	2.0137e+06	1.97441e+06	1.9237e+06	2.03377e+06			2.90491e+06	2.0137e+06	1.97441e+06	1.9237e+06	2.03377e+06			2.90491e+06	2.0137e+06	1.97441e+06	1.9237e+06	2.03377e+06			2.90491e+06	2.0137e+06	1.97441e+06	1.9237e+06	2.03377e+06			2.90491e+06	2.0137e+06	1.97441e+06	1.9237e+06	2.03377e+06
		O&M (total in lifetime)	0	0	0	0	0			0	0	0	0	0			0	0	0	0	0			0	0	0	0	0			0	0	0	0	0
		Decommissioning (10% of Const) [11], EnU Decom (MJ/MW)	334241	245120	241191	236120	247127			334241	245120	241191	236120	247127			334241	245120	241191	236120	247127			334241	245120	241191	236120	247127			334241	245120	241191	236120	247127
		Transport of materials (GtoG+GtoE+D) [7],[12]-[14] (ESOIst) (MJ/MW)	125549	61493.6	61494.4	60862.1	84383.8			125549	61493.6	61494.4	60862.1	84383.8			125549	61493.6	61494.4	60862.1	84383.8			125549	61493.6	61494.4	60862.1	84383.8			125549	61493.6	61494.4	60862.1	84383.8
		Transport of materials (GtoG+GtoE+D) [7],[12]-[14] (ESOI final) (MJ/MW)	313666	185556	185557	184293	231336			313666	185556	185557	184293	231336			313666	185556	185557	184293	231336			313666	185556	185557	184293	231336			313666	185556	185557	184293	231336
		Lifetime (years)	10	10	10	10	10			10	10	10	10	10			10	10	10	10	10			10	10	10	10	10			10	10	10	10	10
		Total embodied energy, CradletoGrave (ESOIst) (MJ/MW)	3.36469e+06	2.32031e+06	2.27709e+06	2.22068e+06	2.36528e+06			3.36469e+06	2.32031e+06	2.27709e+06	2.22068e+06	2.36528e+06			3.36469e+06	2.32031e+06	2.27709e+06	2.22068e+06	2.36528e+06			3.36469e+06	2.32031e+06	2.27709e+06	2.22068e+06	2.36528e+06			3.36469e+06	2.32031e+06	2.27709e+06	2.22068e+06	2.36528e+06
		Total embodied energy, CradletoGrave (ESOIfinal) (MJ/MW)	3.55281e+06	2.44437e+06	2.40115e+06	2.34411e+06	2.51224e+06			3.55281e+06	2.44437e+06	2.40115e+06	2.34411e+06	2.51224e+06			3.55281e+06	2.44437e+06	2.40115e+06	2.34411e+06	2.51224e+06			3.55281e+06	2.44437e+06	2.40115e+06	2.34411e+06	2.51224e+06			3.55281e+06	2.44437e+06	2.40115e+06	2.34411e+06	2.51224e+06
		CF (/1)	0.0249715	0.0249715	0.0249715	0.0249715	0.0249715			0.0249715	0.0249715	0.0249715	0.0249715	0.0249715			0.0249715	0.0249715	0.0249715	0.0249715	0.0249715			0.0249715	0.0249715	0.0249715	0.0249715	0.0249715			0.0249715	0.0249715	0.0249715	0.0249715	0.0249715
		Electricity self-consumption from grid (SC) (/1)	0	0	0	0	0			0	0	0	0	0			0	0	0	0	0			0	0	0	0	0			0	0	0	0	0
		Capacity power (MJ/(year*MW))	31536000	31536000	31536000	31536000	31536000			31536000	31536000	31536000	31536000	31536000			31536000	31536000	31536000	31536000	31536000			31536000	31536000	31536000	31536000	31536000			31536000	31536000	31536000	31536000	31536000
		EaB&E [15] (/1)	0.354446	0.354446	0.354446	0.354446	0.354446			0.454446	0.454446	0.454446	0.454446	0.454446			0.254446	0.254446	0.254446	0.254446	0.254446			0.354446	0.354446	0.354446	0.354446	0.354446			0.354446	0.354446	0.354446	0.354446	0.354446
		Total lifetime operational losses (OL) [10],[15] (/1)	0.012264	0.012264	0.012264	0.012264	0.012264			0.012264	0.012264	0.012264	0.012264	0.012264			0.012264	0.012264	0.012264	0.012264	0.012264			0.012264	0.012264	0.012264	0.012264	0.012264			0.012264	0.012264	0.012264	0.012264	0.012264
		Charge losses ratio (CL) [15] (/1)	0.213155	0.213155	0.213155	0.213155	0.213155			0.213155	0.213155	0.213155	0.213155	0.213155			0.213155	0.213155	0.213155	0.213155	0.213155			0.313155	0.313155	0.313155	0.313155	0.313155			0.113155	0.113155	0.113155	0.113155	0.113155
		Energy delivered at consumer phase (MJ)	5.02139e+06	5.02139e+06	5.02139e+06	5.02139e+06	5.02139e+06			4.24355e+06	4.24355e+06	4.24355e+06	4.24355e+06	4.24355e+06			5.79923e+06	5.79923e+06	5.79923e+06	5.79923e+06	5.79923e+06			5.02139e+06	5.02139e+06	5.02139e+06	5.02139e+06	5.02139e+06			5.02139e+06	5.02139e+06	5.02139e+06	5.02139e+06	5.02139e+06
		Energy delivered at plant phase (MJ)	7778421	7778421	7778421	7778421	7778421			7778421	7778421	7778421	7778421	7778421			7778421	7778421	7778421	7778421	7778421			7778421	7778421	7778421	7778421	7778421			7778421	7778421	7778421	7778421	7778421
		Current grids (O&M) [6], EnU G&S (taking account scrap rate) (MJ/MW)	220165	220165	220165	220165	220165			220165	220165	220165	220165	220165			220165	220165	220165	220165	220165			220165	220165	220165	220165	220165			220165	220165	220165	220165	220165
		Machining rate of EV grids (15%) (MJ/MW)	29003.8	29003.8	29003.8	29003.8	29003.8			29003.8	29003.8	29003.8	29003.8	29003.8			29003.8	29003.8	29003.8	29003.8	29003.8			29003.8	29003.8	29003.8	29003.8	29003.8			29003.8	29003.8	29003.8	29003.8	29003.8
		ESOIst	3.13674	4.5486	4.63493	4.75268	4.46211			3.13674	4.5486	4.63493	4.75268	4.46211			3.13674	4.5486	4.63493	4.75268	4.46211			3.13674	4.5486	4.63493	4.75268	4.46211			3.13674	4.5486	4.63493	4.75268	4.46211
		ESOIfinal	1.12586	1.37831	1.39047	1.40685	1.35965			0.951454	1.1648	1.17508	1.18892	1.14903			1.30026	1.59182	1.60586	1.62478	1.57026			0.958664	1.13581	1.14405	1.15511	1.1231			1.36368	1.75248	1.77218	1.79887	1.72242
				Machining energy EV batteries 200MJ/kWh & Ea&ba +10% & CL +10%							Machining energy EV batteries 200MJ/kWh & Ea&ba -10% & CL +10%							Machining energy EV batteries 200MJ/kWh & Ea&ba +10% & CL -10%							Machining energy EV batteries 200MJ/kWh & Ea&ba -10% & CL -10%
		EnU from Materials (MJ/MW)	2.21935e+06	1.40916e+06	1.37344e+06	1.32734e+06	1.42741e+06			2.21935e+06	1.40916e+06	1.37344e+06	1.32734e+06	1.42741e+06			2.21935e+06	1.40916e+06	1.37344e+06	1.32734e+06	1.42741e+06			2.21935e+06	1.40916e+06	1.37344e+06	1.32734e+06	1.42741e+06
		EnU taking account scrap rate (10%) (MJ/MW)	2.44128e+06	1.55007e+06	1.51078e+06	1.46007e+06	1.57015e+06			2.44128e+06	1.55007e+06	1.51078e+06	1.46007e+06	1.57015e+06			2.44128e+06	1.55007e+06	1.51078e+06	1.46007e+06	1.57015e+06			2.44128e+06	1.55007e+06	1.51078e+06	1.46007e+06	1.57015e+06
		Machining energy of EV Batteries (MJ/MW)	437500	437500	437500	437500	437500			437500	437500	437500	437500	437500			437500	437500	437500	437500	437500			437500	437500	437500	437500	437500
		Machining rate of adittional Cu(15%) (MJ/MW)	26123.8	26123.8	26123.8	26123.8	26123.8			26123.8	26123.8	26123.8	26123.8	26123.8			26123.8	26123.8	26123.8	26123.8	26123.8			26123.8	26123.8	26123.8	26123.8	26123.8
		EnU EV batteryTotal and adittional Cu, EnU NEW cap+Mr (MJ/MW)	2.90491e+06	2.0137e+06	1.97441e+06	1.9237e+06	2.03377e+06			2.90491e+06	2.0137e+06	1.97441e+06	1.9237e+06	2.03377e+06			2.90491e+06	2.0137e+06	1.97441e+06	1.9237e+06	2.03377e+06			2.90491e+06	2.0137e+06	1.97441e+06	1.9237e+06	2.03377e+06
		O&M (total in lifetime)	0	0	0	0	0			0	0	0	0	0			0	0	0	0	0			0	0	0	0	0
		Decommissioning (10% of Const) [11], EnU Decom (MJ/MW)	334241	245120	241191	236120	247127			334241	245120	241191	236120	247127			334241	245120	241191	236120	247127			334241	245120	241191	236120	247127
		Transport of materials (GtoG+GtoE+D) [7],[12]-[14] (ESOIst) (MJ/MW)	125549	61493.6	61494.4	60862.1	84383.8			125549	61493.6	61494.4	60862.1	84383.8			125549	61493.6	61494.4	60862.1	84383.8			125549	61493.6	61494.4	60862.1	84383.8
		Transport of materials (GtoG+GtoE+D) [7],[12]-[14] (ESOI final) (MJ/MW)	313666	185556	185557	184293	231336			313666	185556	185557	184293	231336			313666	185556	185557	184293	231336			313666	185556	185557	184293	231336
		Lifetime (years)	10	10	10	10	10			10	10	10	10	10			10	10	10	10	10			10	10	10	10	10
		Total embodied energy, CradletoGrave (ESOIst) (MJ/MW)	3.36469e+06	2.32031e+06	2.27709e+06	2.22068e+06	2.36528e+06			3.36469e+06	2.32031e+06	2.27709e+06	2.22068e+06	2.36528e+06			3.36469e+06	2.32031e+06	2.27709e+06	2.22068e+06	2.36528e+06			3.36469e+06	2.32031e+06	2.27709e+06	2.22068e+06	2.36528e+06
		Total embodied energy, CradletoGrave (ESOIfinal) (MJ/MW)	3.55281e+06	2.44437e+06	2.40115e+06	2.34411e+06	2.51224e+06			3.55281e+06	2.44437e+06	2.40115e+06	2.34411e+06	2.51224e+06			3.55281e+06	2.44437e+06	2.40115e+06	2.34411e+06	2.51224e+06			3.55281e+06	2.44437e+06	2.40115e+06	2.34411e+06	2.51224e+06
		CF (/1)	0.0249715	0.0249715	0.0249715	0.0249715	0.0249715			0.0249715	0.0249715	0.0249715	0.0249715	0.0249715			0.0249715	0.0249715	0.0249715	0.0249715	0.0249715			0.0249715	0.0249715	0.0249715	0.0249715	0.0249715
		Electricity self-consumption from grid (SC) (/1)	0	0	0	0	0			0	0	0	0	0			0	0	0	0	0			0	0	0	0	0
		Capacity power (MJ/(year*MW))	31536000	31536000	31536000	31536000	31536000			31536000	31536000	31536000	31536000	31536000			31536000	31536000	31536000	31536000	31536000			31536000	31536000	31536000	31536000	31536000
		EaB&E [15] (/1)	0.454446	0.454446	0.454446	0.454446	0.454446			0.254446	0.254446	0.254446	0.254446	0.254446			0.454446	0.454446	0.454446	0.454446	0.454446			0.254446	0.254446	0.254446	0.254446	0.254446
		Total lifetime operational losses (OL) [10],[15] (/1)	0.012264	0.012264	0.012264	0.012264	0.012264			0.012264	0.012264	0.012264	0.012264	0.012264			0.012264	0.012264	0.012264	0.012264	0.012264			0.012264	0.012264	0.012264	0.012264	0.012264
		Charge losses ratio (CL) [15] (/1)	0.313155	0.313155	0.313155	0.313155	0.313155			0.313155	0.313155	0.313155	0.313155	0.313155			0.113155	0.113155	0.113155	0.113155	0.113155			0.113155	0.113155	0.113155	0.113155	0.113155
		Energy delivered at consumer phase (MJ)	4.24355e+06	4.24355e+06	4.24355e+06	4.24355e+06	4.24355e+06			5.79923e+06	5.79923e+06	5.79923e+06	5.79923e+06	5.79923e+06			4.24355e+06	4.24355e+06	4.24355e+06	4.24355e+06	4.24355e+06			5.79923e+06	5.79923e+06	5.79923e+06	5.79923e+06	5.79923e+06
		Energy delivered at plant phase (MJ)	7778421	7778421	7778421	7778421	7778421			7778421	7778421	7778421	7778421	7778421			7778421	7778421	7778421	7778421	7778421			7778421	7778421	7778421	7778421	7778421
		Current grids (O&M) [6], EnU G&S (taking account scrap rate) (MJ/MW)	220165	220165	220165	220165	220165			220165	220165	220165	220165	220165			220165	220165	220165	220165	220165			220165	220165	220165	220165	220165
		Machining rate of EV grids (15%) (MJ/MW)	29003.8	29003.8	29003.8	29003.8	29003.8			29003.8	29003.8	29003.8	29003.8	29003.8			29003.8	29003.8	29003.8	29003.8	29003.8			29003.8	29003.8	29003.8	29003.8	29003.8
		ESOIst	3.13674	4.5486	4.63493	4.75268	4.46211			3.13674	4.5486	4.63493	4.75268	4.46211			3.13674	4.5486	4.63493	4.75268	4.46211			3.13674	4.5486	4.63493	4.75268	4.46211
		ESOIfinal	0.810161	0.959864	0.96683	0.976181	0.949127			1.10717	1.31175	1.32127	1.33405	1.29708			1.15244	1.48101	1.49766	1.52022	1.4556			1.57493	2.02395	2.0467	2.07753	1.98923
References
[1] https://www.hyundai.com/es/modelos/nuevo-ioniq-electrico/autonomia.html
[2] https://www.hyundai.com/es/modelos/kona-electrico/autonomia.html
[3] https://www.evspecifications.com/en/model/d323ad
[4] RENAULT, «Renault ZOE data». https://www.renault.co.uk/electric-vehicles/zoe.html
[5] https://www.volkswagen.es/es/modelos/id3.html
[6] A. Lucas, C. Alexandra Silva, y R. Costa Neto, «Life cycle analysis of energy supply infrastructure for conventional and electric vehicles», Energy Policy, vol. 41, pp. 537-547, feb. 2012, doi: 10.1016/j.enpol.2011.11.015.
[7] C. de Castro y I. Capellán-Pérez, «Standard, Point of Use, and Extended Energy Return on Energy Invested (ESOI) from Comprehensive Material Requirements of Present Global Wind, Solar, and Hydro Power Technologies», Energies, vol. 13, n.o 12, p. 3036, jun. 2020, doi: 10.3390/en13123036.
[8] Volkswagen, «Warranty - Terms and Conditions». https://www.volkswagen.co.uk/owners-and-drivers/my-car/warranties/new-car-terms
[9] Hyundai, «Hyundai 5 Year Warranty Terms and Conditions». [En línea]. Disponible en: https://www.hyundai.co.uk/5-year-warranty/5_year_warranty-terms-and-conditions.pdf
[10] https://www.geotab.com/fleet-management-solutions/ev-battery-degradation-tool/
[11] E. G. Hertwich et al., «Integrated life-cycle assessment of electricity-supply scenarios confirms global environmental benefit of low-carbon technologies», Proc. Natl. Acad. Sci., vol. 112, n.o 20, pp. 6277-6282, may 2015, doi: 10.1073/pnas.1312753111.
[12] M. Schmied y W. Knörr, «Calculating GHG emissions for freight forwarding and logistics services in accordance with EN 16258». 2012. [En línea]. Disponible en: https://www.clecat.org/media/CLECAT_Guide_on_Calculating_GHG_emissions_for_freight_forwarding_and_logistics_services.pdf
[13] Z. Kis, N. Pandya, y R. H. E. M. Koppelaar, «Electricity generation technologies: Comparison of materials use, energy return on investment, jobs creation and CO2 emissions reduction», Energy Policy, vol. 120, pp. 144-157, sep. 2018, doi: 10.1016/j.enpol.2018.05.033
[14] S. Teske, Achieving the paris climate agreement goals: global and regional 100% renewable energy scenarios with non-energy GHG pathways for +1.5c and +2c. New York, NY: Springer Berlin Heidelberg, 2018.
[15] A. D. Duce et al., «eLCAr: Guidelines for the LCA of electric vehicles», 2013, doi: 10.13140/RG.2.1.2782.8244.
[16] J.Porzio et al. Life‐Cycle Assessment Considerations for Batteries and Battery Materials (2021) DOI:10.1002/aenm.202100771
[truncated: 2 more columns]

## Sheet: ESOIstatic 4W-taxi
	TAXI	Mileage (km)
		300000	LMO	NMC 622	NMC 811	NCA	LFP
		Autonomy (km) [1]-[4],[5]	420	420	420	420	420
		Cycles (number of cycles)	797.978	797.978	797.978	797.978	797.978
		Capacity (kWh)	60	60	60	60	60
		Energy spent over lifetime for transport (MJ)	154286	154286	154286	154286	154286
		Battery wear factor [10]	0.1	0.1	0.1	0.1	0.1
		Operational losses per time (OL) [10],[15] (%/h)	0.014	0.014	0.014	0.014	0.014
		Power (W)	100000	100000	100000	100000	100000
		Average power used (W)	489.237	489.237	489.237	489.237	489.237
		CF (/1)	0.00489237	0.00489237	0.00489237	0.00489237	0.00489237
		Machining energy of EV Batteries (MJ/kWh)	400	400	400	400	400
		Lifetime (years) [8]-[9]	10	10	10	10	10
		g [7]	0.737
		Ratio which represent the energy lost in the auxiliary processes necessary for the operation of the electric vehicle at the reference [15] with respect to total energy obtained from the grid (/1)	0.291
		Ratio which represent the energy lost in the charging process at the reference [15] with respect to total energy obtained from the grid (/1)	0.175
		Energy stored in the battery in relation to the energy coming from the grid in the reference [15] (/1). Used to adapt the loss ratios of the reference to our case.	0.821
									Uncertainly analysis (300000 km)
												Ea&ba +10%							Ea&ba -10%							CL +10%							CL -10%
		EnU from Materials (MJ/MW)	607902	385679	375881	363237	390685			607902	385679	375881	363237	390685			607902	385679	375881	363237	390685			607902	385679	375881	363237	390685			607902	385679	375881	363237	390685
		EnU taking account scrap rate (10%) (MJ/MW)	668692	424247	413470	399561	429753			668692	424247	413470	399561	429753			668692	424247	413470	399561	429753			668692	424247	413470	399561	429753			668692	424247	413470	399561	429753
		Machining energy of EV Batteries (MJ/MW)	240000	240000	240000	240000	240000			240000	240000	240000	240000	240000			240000	240000	240000	240000	240000			240000	240000	240000	240000	240000			240000	240000	240000	240000	240000
		Machining rate of adittional Cu(15%) (MJ/MW)	1043.76	1043.76	1043.76	1043.76	1043.76			1043.76	1043.76	1043.76	1043.76	1043.76			1043.76	1043.76	1043.76	1043.76	1043.76			1043.76	1043.76	1043.76	1043.76	1043.76			1043.76	1043.76	1043.76	1043.76	1043.76
		EnU EV batteryTotal and adittional Cu, EnU NEW cap+Mr (MJ/MW)	909736	665290	654513	640604	670797			909736	665290	654513	640604	670797			909736	665290	654513	640604	670797			909736	665290	654513	640604	670797			909736	665290	654513	640604	670797				Performance factors, Method
		O&M (total in lifetime)	0	0	0	0	0			0	0	0	0	0			0	0	0	0	0			0	0	0	0	0			0	0	0	0	0				- Nominal power capacity considered: 1 MW.
		Decommissioning (10% of Const) [11], EnU Decom (MJ/MW)	90973.6	66529	65451.3	64060.4	67079.7			90973.6	66529	65451.3	64060.4	67079.7			90973.6	66529	65451.3	64060.4	67079.7			90973.6	66529	65451.3	64060.4	67079.7			90973.6	66529	65451.3	64060.4	67079.7				- CF: Capacity factor, the ratio between the amount of energy a battery releases with a real use and the maximum energy it can release in the same period.
		Transport of materials (GtoG+GtoE+D) [7],[12]-[14] (ESOIst) (MJ/MW)	34436.2	16866.8	16867	16693.6	23145.3			34436.2	16866.8	16867	16693.6	23145.3			34436.2	16866.8	16867	16693.6	23145.3			34436.2	16866.8	16867	16693.6	23145.3			34436.2	16866.8	16867	16693.6	23145.3
		Transport of materials (GtoG+GtoE+D) [7],[12]-[14] (ESOI final) (MJ/MW)	131441	96302	96302.5	95955.6	108859			131441	96302	96302.5	95955.6	108859			131441	96302	96302.5	95955.6	108859			131441	96302	96302.5	95955.6	108859			131441	96302	96302.5	95955.6	108859				- L: Battery operational life time.
		Lifetime (years)	10	10	10	10	10			10	10	10	10	10			10	10	10	10	10			10	10	10	10	10			10	10	10	10	10				- OL: The coefficient represents the fixed electricity losses of the batteries, it is the energy lost by the self-discharge of the batteries over time.
		Total embodied energy, CradletoGrave (ESOIst) (MJ/MW)	1.03515e+06	748686	736832	721358	761022			1.03515e+06	748686	736832	721358	761022			1.03515e+06	748686	736832	721358	761022			1.03515e+06	748686	736832	721358	761022			1.03515e+06	748686	736832	721358	761022
		Total embodied energy, CradletoGrave (ESOIfinal) (MJ/MW)	1.13215e+06	828122	816267	800620	846736			1.13215e+06	828122	816267	800620	846736			1.13215e+06	828122	816267	800620	846736			1.13215e+06	828122	816267	800620	846736			1.13215e+06	828122	816267	800620	846736				- EaB&E: The energy losses from the energy stored in the batteries to the energy that actually drives and operates the electric vehicle. Also included are other losses such as the energy used to drive and acclimatize the system (battery and electronics). Due to the high variability of this coefficient, an uncertainty analysis will be implemented.
		CF (/1)	0.00489237	0.00489237	0.00489237	0.00489237	0.00489237			0.00489237	0.00489237	0.00489237	0.00489237	0.00489237			0.00489237	0.00489237	0.00489237	0.00489237	0.00489237			0.00489237	0.00489237	0.00489237	0.00489237	0.00489237			0.00489237	0.00489237	0.00489237	0.00489237	0.00489237
		Electricity self-consumption from grid (SC) (/1)	0	0	0	0	0			0	0	0	0	0			0	0	0	0	0			0	0	0	0	0			0	0	0	0	0
		Capacity power (MJ/(year*MW))	31536000	31536000	31536000	31536000	31536000			31536000	31536000	31536000	31536000	31536000			31536000	31536000	31536000	31536000	31536000			31536000	31536000	31536000	31536000	31536000			31536000	31536000	31536000	31536000	31536000				- CL: Ratio used to calculate the losses from the electrical grid to the charger and from this to the battery, in addition to the energy used in its maintenance.
		EaB&E [15] (/1)	0.354446	0.354446	0.354446	0.354446	0.354446			0.454446	0.454446	0.454446	0.454446	0.454446			0.254446	0.254446	0.254446	0.254446	0.254446			0.354446	0.354446	0.354446	0.354446	0.354446			0.354446	0.354446	0.354446	0.354446	0.354446				- g: Coefficient to convert the primary energy used in the denominator into equivalent final energy
		Total operational losses (OL) [10],[15] (/1)	0.0171696	0.0171696	0.0171696	0.0171696	0.0171696			0.0171696	0.0171696	0.0171696	0.0171696	0.0171696			0.0171696	0.0171696	0.0171696	0.0171696	0.0171696			0.0171696	0.0171696	0.0171696	0.0171696	0.0171696			0.0171696	0.0171696	0.0171696	0.0171696	0.0171696				- EnUNew cap: Primary energy used (joules) for the construction phase of the new installed capacity (cradle to gate). The equation to obtain it is as follows
		Charge losses ratio (CL) [15] (/1)	0.213155	0.213155	0.213155	0.213155	0.213155			0.213155	0.213155	0.213155	0.213155	0.213155			0.213155	0.213155	0.213155	0.213155	0.213155			0.313155	0.313155	0.313155	0.313155	0.313155			0.113155	0.113155	0.113155	0.113155	0.113155				- EnUDecom: Primary energy used (joules) to dismantle the infrastructures that have finished their useful life. 10% of the EnUNew cap is assumed for all technologies that follow [11] due to the lack of relevant global data.
		Energy delivered at consumer phase (MJ)	978897	978897	978897	978897	978897			827260	827260	827260	827260	827260			1.13053e+06	1.13053e+06	1.13053e+06	1.13053e+06	1.13053e+06			978897	978897	978897	978897	978897			978897	978897	978897	978897	978897
		Energy delivered at plant phase (MJ)	1.51637e+06	1.51637e+06	1.51637e+06	1.51637e+06	1.51637e+06			1.51637e+06	1.51637e+06	1.51637e+06	1.51637e+06	1.51637e+06			1.51637e+06	1.51637e+06	1.51637e+06	1.51637e+06	1.51637e+06			1.51637e+06	1.51637e+06	1.51637e+06	1.51637e+06	1.51637e+06			1.51637e+06	1.51637e+06	1.51637e+06	1.51637e+06	1.51637e+06				- EnUG&S: Primary energy used (joules) in the construction and maintenance of the networks, storage and other related infrastructure needed to transport and manage electricity to the point of use.
		Current grids (O&M) [6], EnU G&S (taking account scrap rate) (MJ/MW)	220165	220165	220165	220165	220165			220165	220165	220165	220165	220165			220165	220165	220165	220165	220165			220165	220165	220165	220165	220165			220165	220165	220165	220165	220165
		Machining rate of EV grids (15%) (MJ/MW)	29003.8	29003.8	29003.8	29003.8	29003.8			29003.8	29003.8	29003.8	29003.8	29003.8			29003.8	29003.8	29003.8	29003.8	29003.8			29003.8	29003.8	29003.8	29003.8	29003.8			29003.8	29003.8	29003.8	29003.8	29003.8				- EnUTra: Primary energy used for the transport of the materials (diesel, fuel oil...) [12]-[14], employing the methodology used by De Castro et al [7]
		ESOIst	1.98763	2.74813	2.79234	2.85224	2.70358			1.98763	2.74813	2.79234	2.85224	2.70358			1.98763	2.74813	2.79234	2.85224	2.70358			1.98763	2.74813	2.79234	2.85224	2.70358			1.98763	2.74813	2.79234	2.85224	2.70358				- EnUMr: Primary energy used in the manufacture of batteries, chargers....
		ESOIfinal	0.729838	0.876218	0.883125	0.892409	0.865589			0.616782	0.740487	0.746324	0.75417	0.731505			0.842894	1.01195	1.01993	1.03065	0.999674			0.655706	0.771502	0.776851	0.784026	0.763249			0.822868	1.01383	1.02308	1.03556	0.999624
					Ea&ba +10% & CL +10%							Ea&ba -10% & CL +10%							Ea&ba +10% & CL -10%							Ea&ba -10% & CL -10%
		EnU from Materials (MJ/MW)	607902	385679	375881	363237	390685			607902	385679	375881	363237	390685			607902	385679	375881	363237	390685			607902	385679	375881	363237	390685											Performance factors, Results
		EnU taking account scrap rate (10%) (MJ/MW)	668692	424247	413470	399561	429753			668692	424247	413470	399561	429753			668692	424247	413470	399561	429753			668692	424247	413470	399561	429753											-CF: Based on a 60 kWh battery assuming a cycle range of 420 km and a lifetime of 10 years in which depending on the case between 300,000 km and 400,000 km will be realized. The lifetime energy expenditure for transport is between 154285MJ and 205714 MJ
		Machining energy of EV Batteries (MJ/MW)	240000	240000	240000	240000	240000			240000	240000	240000	240000	240000			240000	240000	240000	240000	240000			240000	240000	240000	240000	240000											-OL: constant electricity operational losses of the batteries by the self-discharge of the batteries set at 0.014% (capacity)/h [15]. The battery consumes 0.014% of the total charge cycle every hour of its life by self-discharge. This translates into cycles of use that have not been used to move the vehicle, which means losses. To find the total loss rate, the cycles lost due to self-discharge ar…
		Machining rate of adittional Cu(15%) (MJ/MW)	1043.76	1043.76	1043.76	1043.76	1043.76			1043.76	1043.76	1043.76	1043.76	1043.76			1043.76	1043.76	1043.76	1043.76	1043.76			1043.76	1043.76	1043.76	1043.76	1043.76
		EnU EV batteryTotal and adittional Cu, EnU NEW cap+Mr (MJ/MW)	909736	665290	654513	640604	670797			909736	665290	654513	640604	670797			909736	665290	654513	640604	670797			909736	665290	654513	640604	670797											- EaB&E: The energy losses from the energy stored in the batteries to the energy that actually drives and operates the electric vehicle, Also included are other losses such as the energy used to drive and acclimatize the system (battery, electronics and the car cabin) [15]. An arc of 10% has been taken in these losses since they depend largely on the geographical area where the vehicle is located.
		O&M (total in lifetime)	0	0	0	0	0			0	0	0	0	0			0	0	0	0	0			0	0	0	0	0
		Decommissioning (10% of Const) [11], EnU Decom (MJ/MW)	90973.6	66529	65451.3	64060.4	67079.7			90973.6	66529	65451.3	64060.4	67079.7			90973.6	66529	65451.3	64060.4	67079.7			90973.6	66529	65451.3	64060.4	67079.7
		Transport of materials (GtoG+GtoE+D) [7],[12]-[14] (ESOIst) (MJ/MW)	34436.2	16866.8	16867	16693.6	23145.3			34436.2	16866.8	16867	16693.6	23145.3			34436.2	16866.8	16867	16693.6	23145.3			34436.2	16866.8	16867	16693.6	23145.3											-CL: We take a value for the charge losses ratio in order to maintain the same ratio between the energy stored over the lifetime and the energy lost in the charging process as the reference [15]. A variation of this coefficient of +- 10% has been taken, since it depends on the losses at the time of the load of the vehicle (type of charger where it is charged and speed of charge).
		Transport of materials (GtoG+GtoE+D) [7],[12]-[14] (ESOI final) (MJ/MW)	131441	96302	96302.5	95955.6	108859			131441	96302	96302.5	95955.6	108859			131441	96302	96302.5	95955.6	108859			131441	96302	96302.5	95955.6	108859											-g: The data of the g coefficient of the batteries has been found in the following bibliographic source [7].
		Lifetime (years)	10	10	10	10	10			10	10	10	10	10			10	10	10	10	10			10	10	10	10	10											-EnUNew cap: Data obtained through the embedded energy of the different minerals and the composition of the batteries (Electric batteries sheet).
		Total embodied energy, CradletoGrave (ESOIst) (MJ/MW)	1.03515e+06	748686	736832	721358	761022			1.03515e+06	748686	736832	721358	761022			1.03515e+06	748686	736832	721358	761022			1.03515e+06	748686	736832	721358	761022											- EnUDecom: final energy used (joules) to dismantle the infrastructures that have finished their useful life. 10% of the EnUNew cap is assumed for all technologies that follow [11] due to the lack of relevant global data.
		Total embodied energy, CradletoGrave (ESOIfinal) (MJ/MW)	1.13215e+06	828122	816267	800620	846736			1.13215e+06	828122	816267	800620	846736			1.13215e+06	828122	816267	800620	846736			1.13215e+06	828122	816267	800620	846736
		CF (/1)	0.00489237	0.00489237	0.00489237	0.00489237	0.00489237			0.00489237	0.00489237	0.00489237	0.00489237	0.00489237			0.00489237	0.00489237	0.00489237	0.00489237	0.00489237			0.00489237	0.00489237	0.00489237	0.00489237	0.00489237											EnUG&S: Results of EnU of chargers and grids sheet. The network data have been obtained from [6]
		Electricity self-consumption from grid (SC) (/1)	0	0	0	0	0			0	0	0	0	0			0	0	0	0	0			0	0	0	0	0
		Capacity power (MJ/(year*MW))	31536000	31536000	31536000	31536000	31536000			31536000	31536000	31536000	31536000	31536000			31536000	31536000	31536000	31536000	31536000			31536000	31536000	31536000	31536000	31536000											-EnUTra: Energy used in transport using the weight of each of the battery components and data from [12]-[14]. The calculations are clearly expressed in transport sheet.
		EaB&E [15] (/1)	0.454446	0.454446	0.454446	0.454446	0.454446			0.254446	0.254446	0.254446	0.254446	0.254446			0.454446	0.454446	0.454446	0.454446	0.454446			0.254446	0.254446	0.254446	0.254446	0.254446											- EnUMr: Primary energy used in the manufacture of batteries is obtained from [16]; an arc between 200 MJ/kWh and 800 MJ/kWh has been taken as an uncertainty analysis trying to represent as well as possible the figure 3 of the reference. For all other elements of the technology, 15% has been taken with respect to their EnU [7]
		Total operational losses (OL) [10],[15] (/1)	0.0171696	0.0171696	0.0171696	0.0171696	0.0171696			0.0171696	0.0171696	0.0171696	0.0171696	0.0171696			0.0171696	0.0171696	0.0171696	0.0171696	0.0171696			0.0171696	0.0171696	0.0171696	0.0171696	0.0171696
		Charge losses ratio (CL) [15] (/1)	0.313155	0.313155	0.313155	0.313155	0.313155			0.313155	0.313155	0.313155	0.313155	0.313155			0.113155	0.113155	0.113155	0.113155	0.113155			0.113155	0.113155	0.113155	0.113155	0.113155
		Energy delivered at consumer phase (MJ)	827260	827260	827260	827260	827260			1.13053e+06	1.13053e+06	1.13053e+06	1.13053e+06	1.13053e+06			827260	827260	827260	827260	827260			1.13053e+06	1.13053e+06	1.13053e+06	1.13053e+06	1.13053e+06
		Energy delivered at plant phase (MJ)	1.51637e+06	1.51637e+06	1.51637e+06	1.51637e+06	1.51637e+06			1.51637e+06	1.51637e+06	1.51637e+06	1.51637e+06	1.51637e+06			1.51637e+06	1.51637e+06	1.51637e+06	1.51637e+06	1.51637e+06			1.51637e+06	1.51637e+06	1.51637e+06	1.51637e+06	1.51637e+06
		Current grids (O&M) [6], EnU G&S (taking account scrap rate) (MJ/MW)	220165	220165	220165	220165	220165			220165	220165	220165	220165	220165			220165	220165	220165	220165	220165			220165	220165	220165	220165	220165
		Machining rate of EV grids (15%) (MJ/MW)	29003.8	29003.8	29003.8	29003.8	29003.8			29003.8	29003.8	29003.8	29003.8	29003.8			29003.8	29003.8	29003.8	29003.8	29003.8			29003.8	29003.8	29003.8	29003.8	29003.8
		ESOIst	1.98763	2.74813	2.79234	2.85224	2.70358			1.98763	2.74813	2.79234	2.85224	2.70358			1.98763	2.74813	2.79234	2.85224	2.70358			1.98763	2.74813	2.79234	2.85224	2.70358
		ESOIfinal	0.554134	0.651992	0.656512	0.662576	0.645018			0.757279	0.891012	0.897189	0.905476	0.881481			0.695401	0.856779	0.864602	0.87515	0.844776			0.950335	1.17087	1.18157	1.19598	1.15447
				Machining energy EV batteries 800MJ/kWh							Machining energy EV batteries 800MJ/kWh & Ea&ba +10%							Machining energy EV batteries 800MJ/kWh & Ea&ba -10%							Machining energy EV batteries 800MJ/kWh & CL+10%							Machining energy EV batteries 800MJ/kWh & CL-10%
		EnU from Materials (MJ/MW)	607902	385679	375881	363237	390685			607902	385679	375881	363237	390685			607902	385679	375881	363237	390685			607902	385679	375881	363237	390685			607902	385679	375881	363237	390685
		EnU taking account scrap rate (10%) (MJ/MW)	668692	424247	413470	399561	429753			668692	424247	413470	399561	429753			668692	424247	413470	399561	429753			668692	424247	413470	399561	429753			668692	424247	413470	399561	429753
		Machining energy of EV Batteries (MJ/MW)	480000	480000	480000	480000	480000			480000	480000	480000	480000	480000			480000	480000	480000	480000	480000			480000	480000	480000	480000	480000			480000	480000	480000	480000	480000
		Machining rate of adittional Cu(15%) (MJ/MW)	1043.76	1043.76	1043.76	1043.76	1043.76			1043.76	1043.76	1043.76	1043.76	1043.76			1043.76	1043.76	1043.76	1043.76	1043.76			1043.76	1043.76	1043.76	1043.76	1043.76			1043.76	1043.76	1043.76	1043.76	1043.76
		EnU EV batteryTotal and adittional Cu, EnU NEW cap+Mr (MJ/MW)	1.14974e+06	905290	894513	880604	910797			1.14974e+06	905290	894513	880604	910797			1.14974e+06	905290	894513	880604	910797			1.14974e+06	905290	894513	880604	910797			1.14974e+06	905290	894513	880604	910797
		O&M (total in lifetime)	0	0	0	0	0			0	0	0	0	0			0	0	0	0	0			0	0	0	0	0			0	0	0	0	0
		Decommissioning (10% of Const) [11], EnU Decom (MJ/MW)	90973.6	66529	65451.3	64060.4	67079.7			90973.6	66529	65451.3	64060.4	67079.7			90973.6	66529	65451.3	64060.4	67079.7			90973.6	66529	65451.3	64060.4	67079.7			90973.6	66529	65451.3	64060.4	67079.7
		Transport of materials (GtoG+GtoE+D) [7],[12]-[14] (ESOIst) (MJ/MW)	34436.2	16866.8	16867	16693.6	23145.3			34436.2	16866.8	16867	16693.6	23145.3			34436.2	16866.8	16867	16693.6	23145.3			34436.2	16866.8	16867	16693.6	23145.3			34436.2	16866.8	16867	16693.6	23145.3
		Transport of materials (GtoG+GtoE+D) [7],[12]-[14] (ESOI final) (MJ/MW)	131441	96302	96302.5	95955.6	108859			131441	96302	96302.5	95955.6	108859			131441	96302	96302.5	95955.6	108859			131441	96302	96302.5	95955.6	108859			131441	96302	96302.5	95955.6	108859
		Lifetime (years)	10	10	10	10	10			10	10	10	10	10			10	10	10	10	10			10	10	10	10	10			10	10	10	10	10
		Total embodied energy, CradletoGrave (ESOIst) (MJ/MW)	1.27515e+06	988686	976832	961358	1.00102e+06			1.27515e+06	988686	976832	961358	1.00102e+06			1.27515e+06	988686	976832	961358	1.00102e+06			1.27515e+06	988686	976832	961358	1.00102e+06			1.27515e+06	988686	976832	961358	1.00102e+06
		Total embodied energy, CradletoGrave (ESOIfinal) (MJ/MW)	1.37215e+06	1.06812e+06	1.05627e+06	1.04062e+06	1.08674e+06			1.37215e+06	1.06812e+06	1.05627e+06	1.04062e+06	1.08674e+06			1.37215e+06	1.06812e+06	1.05627e+06	1.04062e+06	1.08674e+06			1.37215e+06	1.06812e+06	1.05627e+06	1.04062e+06	1.08674e+06			1.37215e+06	1.06812e+06	1.05627e+06	1.04062e+06	1.08674e+06
		CF (/1)	0.00489237	0.00489237	0.00489237	0.00489237	0.00489237			0.00489237	0.00489237	0.00489237	0.00489237	0.00489237			0.00489237	0.00489237	0.00489237	0.00489237	0.00489237			0.00489237	0.00489237	0.00489237	0.00489237	0.00489237			0.00489237	0.00489237	0.00489237	0.00489237	0.00489237
		Electricity self-consumption from grid (SC) (/1)	0	0	0	0	0			0	0	0	0	0			0	0	0	0	0			0	0	0	0	0			0	0	0	0	0
		Capacity power (MJ/(year*MW))	31536000	31536000	31536000	31536000	31536000			31536000	31536000	31536000	31536000	31536000			31536000	31536000	31536000	31536000	31536000			31536000	31536000	31536000	31536000	31536000			31536000	31536000	31536000	31536000	31536000
		EaB&E [15] (/1)	0.354446	0.354446	0.354446	0.354446	0.354446			0.454446	0.454446	0.454446	0.454446	0.454446			0.254446	0.254446	0.254446	0.254446	0.254446			0.354446	0.354446	0.354446	0.354446	0.354446			0.354446	0.354446	0.354446	0.354446	0.354446
		Total operational losses (OL) [10],[15] (/1)	0.0171696	0.0171696	0.0171696	0.0171696	0.0171696			0.0171696	0.0171696	0.0171696	0.0171696	0.0171696			0.0171696	0.0171696	0.0171696	0.0171696	0.0171696			0.0171696	0.0171696	0.0171696	0.0171696	0.0171696			0.0171696	0.0171696	0.0171696	0.0171696	0.0171696
		Charge losses ratio (CL) [15] (/1)	0.213155	0.213155	0.213155	0.213155	0.213155			0.213155	0.213155	0.213155	0.213155	0.213155			0.213155	0.213155	0.213155	0.213155	0.213155			0.313155	0.313155	0.313155	0.313155	0.313155			0.113155	0.113155	0.113155	0.113155	0.113155
		Energy delivered at consumer phase (MJ)	978897	978897	978897	978897	978897			827260	827260	827260	827260	827260			1.13053e+06	1.13053e+06	1.13053e+06	1.13053e+06	1.13053e+06			978897	978897	978897	978897	978897			978897	978897	978897	978897	978897
		Energy delivered at plant phase (MJ)	1.51637e+06	1.51637e+06	1.51637e+06	1.51637e+06	1.51637e+06			1.51637e+06	1.51637e+06	1.51637e+06	1.51637e+06	1.51637e+06			1.51637e+06	1.51637e+06	1.51637e+06	1.51637e+06	1.51637e+06			1.51637e+06	1.51637e+06	1.51637e+06	1.51637e+06	1.51637e+06			1.51637e+06	1.51637e+06	1.51637e+06	1.51637e+06	1.51637e+06
		Current grids (O&M) [6], EnU G&S (taking account scrap rate) (MJ/MW)	220165	220165	220165	220165	220165			220165	220165	220165	220165	220165			220165	220165	220165	220165	220165			220165	220165	220165	220165	220165			220165	220165	220165	220165	220165
		Machining rate of EV grids (15%) (MJ/MW)	29003.8	29003.8	29003.8	29003.8	29003.8			29003.8	29003.8	29003.8	29003.8	29003.8			29003.8	29003.8	29003.8	29003.8	29003.8			29003.8	29003.8	29003.8	29003.8	29003.8			29003.8	29003.8	29003.8	29003.8	29003.8
		ESOIst	1.61353	2.08103	2.10628	2.14019	2.05539			1.61353	2.08103	2.10628	2.14019	2.05539			1.61353	2.08103	2.10628	2.14019	2.05539			1.61353	2.08103	2.10628	2.14019	2.05539			1.61353	2.08103	2.10628	2.14019	2.05539
		ESOIfinal	0.644803	0.756452	0.761594	0.768488	0.748517			0.54492	0.639273	0.643619	0.649445	0.632567			0.744687	0.873631	0.879569	0.887532	0.864466			0.586247	0.677109	0.681226	0.686737	0.670744			0.716355	0.856857	0.863461	0.872334	0.84669
				Machining energy EV batteries 800MJ/kWh & Ea&ba +10% & CL +10%							Machining energy EV batteries 800MJ/kWh & Ea&ba -10% & CL +10%							Machining energy EV batteries 800MJ/kWh & Ea&ba +10% & CL -10%							Machining energy EV batteries 800MJ/kWh & Ea&ba -10% & CL -10%
		EnU from Materials (MJ/MW)	607902	385679	375881	363237	390685			607902	385679	375881	363237	390685			607902	385679	375881	363237	390685			607902	385679	375881	363237	390685
		EnU taking account scrap rate (10%) (MJ/MW)	668692	424247	413470	399561	429753			668692	424247	413470	399561	429753			668692	424247	413470	399561	429753			668692	424247	413470	399561	429753
		Machining energy of EV Batteries (MJ/MW)	480000	480000	480000	480000	480000			480000	480000	480000	480000	480000			480000	480000	480000	480000	480000			480000	480000	480000	480000	480000
		Machining rate of adittional Cu(15%) (MJ/MW)	1043.76	1043.76	1043.76	1043.76	1043.76			1043.76	1043.76	1043.76	1043.76	1043.76			1043.76	1043.76	1043.76	1043.76	1043.76			1043.76	1043.76	1043.76	1043.76	1043.76
		EnU EV batteryTotal and adittional Cu, EnU NEW cap+Mr (MJ/MW)	1.14974e+06	905290	894513	880604	910797			1.14974e+06	905290	894513	880604	910797			1.14974e+06	905290	894513	880604	910797			1.14974e+06	905290	894513	880604	910797
		O&M (total in lifetime)	0	0	0	0	0			0	0	0	0	0			0	0	0	0	0			0	0	0	0	0
		Decommissioning (10% of Const) [11], EnU Decom (MJ/MW)	90973.6	66529	65451.3	64060.4	67079.7			90973.6	66529	65451.3	64060.4	67079.7			90973.6	66529	65451.3	64060.4	67079.7			90973.6	66529	65451.3	64060.4	67079.7
		Transport of materials (GtoG+GtoE+D) [7],[12]-[14] (ESOIst) (MJ/MW)	34436.2	16866.8	16867	16693.6	23145.3			34436.2	16866.8	16867	16693.6	23145.3			34436.2	16866.8	16867	16693.6	23145.3			34436.2	16866.8	16867	16693.6	23145.3
		Transport of materials (GtoG+GtoE+D) [7],[12]-[14] (ESOI final) (MJ/MW)	131441	96302	96302.5	95955.6	108859			131441	96302	96302.5	95955.6	108859			131441	96302	96302.5	95955.6	108859			131441	96302	96302.5	95955.6	108859
		Lifetime (years)	10	10	10	10	10			10	10	10	10	10			10	10	10	10	10			10	10	10	10	10
		Total embodied energy, CradletoGrave (ESOIst) (MJ/MW)	1.27515e+06	988686	976832	961358	1.00102e+06			1.27515e+06	988686	976832	961358	1.00102e+06			1.27515e+06	988686	976832	961358	1.00102e+06			1.27515e+06	988686	976832	961358	1.00102e+06
		Total embodied energy, CradletoGrave (ESOIfinal) (MJ/MW)	1.37215e+06	1.06812e+06	1.05627e+06	1.04062e+06	1.08674e+06			1.37215e+06	1.06812e+06	1.05627e+06	1.04062e+06	1.08674e+06			1.37215e+06	1.06812e+06	1.05627e+06	1.04062e+06	1.08674e+06			1.37215e+06	1.06812e+06	1.05627e+06	1.04062e+06	1.08674e+06
		CF (/1)	0.00489237	0.00489237	0.00489237	0.00489237	0.00489237			0.00489237	0.00489237	0.00489237	0.00489237	0.00489237			0.00489237	0.00489237	0.00489237	0.00489237	0.00489237			0.00489237	0.00489237	0.00489237	0.00489237	0.00489237
		Electricity self-consumption from grid (SC) (/1)	0	0	0	0	0			0	0	0	0	0			0	0	0	0	0			0	0	0	0	0
		Capacity power (MJ/(year*MW))	31536000	31536000	31536000	31536000	31536000			31536000	31536000	31536000	31536000	31536000			31536000	31536000	31536000	31536000	31536000			31536000	31536000	31536000	31536000	31536000
		EaB&E [15] (/1)	0.454446	0.454446	0.454446	0.454446	0.454446			0.254446	0.254446	0.254446	0.254446	0.254446			0.454446	0.454446	0.454446	0.454446	0.454446			0.254446	0.254446	0.254446	0.254446	0.254446
		Total operational losses (OL) [10],[15] (/1)	0.0171696	0.0171696	0.0171696	0.0171696	0.0171696			0.0171696	0.0171696	0.0171696	0.0171696	0.0171696			0.0171696	0.0171696	0.0171696	0.0171696	0.0171696			0.0171696	0.0171696	0.0171696	0.0171696	0.0171696
		Charge losses ratio (CL) [15] (/1)	0.313155	0.313155	0.313155	0.313155	0.313155			0.313155	0.313155	0.313155	0.313155	0.313155			0.113155	0.113155	0.113155	0.113155	0.113155			0.113155	0.113155	0.113155	0.113155	0.113155
		Energy delivered at consumer phase (MJ)	827260	827260	827260	827260	827260			1.13053e+06	1.13053e+06	1.13053e+06	1.13053e+06	1.13053e+06			827260	827260	827260	827260	827260			1.13053e+06	1.13053e+06	1.13053e+06	1.13053e+06	1.13053e+06
		Energy delivered at plant phase (MJ)	1.51637e+06	1.51637e+06	1.51637e+06	1.51637e+06	1.51637e+06			1.51637e+06	1.51637e+06	1.51637e+06	1.51637e+06	1.51637e+06			1.51637e+06	1.51637e+06	1.51637e+06	1.51637e+06	1.51637e+06			1.51637e+06	1.51637e+06	1.51637e+06	1.51637e+06	1.51637e+06
		Current grids (O&M) [6], EnU G&S (taking account scrap rate) (MJ/MW)	220165	220165	220165	220165	220165			220165	220165	220165	220165	220165			220165	220165	220165	220165	220165			220165	220165	220165	220165	220165
		Machining rate of EV grids (15%) (MJ/MW)	29003.8	29003.8	29003.8	29003.8	29003.8			29003.8	29003.8	29003.8	29003.8	29003.8			29003.8	29003.8	29003.8	29003.8	29003.8			29003.8	29003.8	29003.8	29003.8	29003.8
		ESOIst	1.61353	2.08103	2.10628	2.14019	2.05539			1.61353	2.08103	2.10628	2.14019	2.05539			1.61353	2.08103	2.10628	2.14019	2.05539			1.61353	2.08103	2.10628	2.14019	2.05539
		ESOIfinal	0.495434	0.572221	0.5757	0.580358	0.566842			0.67706	0.781997	0.786752	0.793117	0.774646			0.605388	0.724125	0.729706	0.737204	0.715533			0.827323	0.989589	0.997216	1.00746	0.977847
				Machining energy EV batteries 200MJ/kWh							Machining energy EV batteries 200MJ/kWh & Ea&ba +10%							Machining energy EV batteries 200MJ/kWh & Ea&ba -10%							Machining energy EV batteries 200MJ/kWh & CL+10%							Machining energy EV batteries 200MJ/kWh & CL-10%
		EnU from Materials (MJ/MW)	607902	385679	375881	363237	390685			607902	385679	375881	363237	390685			607902	385679	375881	363237	390685			607902	385679	375881	363237	390685			607902	385679	375881	363237	390685
		EnU taking account scrap rate (10%) (MJ/MW)	668692	424247	413470	399561	429753			668692	424247	413470	399561	429753			668692	424247	413470	399561	429753			668692	424247	413470	399561	429753			668692	424247	413470	399561	429753
		Machining energy of EV Batteries (MJ/MW)	120000	120000	120000	120000	120000			120000	120000	120000	120000	120000			120000	120000	120000	120000	120000			120000	120000	120000	120000	120000			120000	120000	120000	120000	120000
		Machining rate of adittional Cu(15%) (MJ/MW)	1043.76	1043.76	1043.76	1043.76	1043.76			1043.76	1043.76	1043.76	1043.76	1043.76			1043.76	1043.76	1043.76	1043.76	1043.76			1043.76	1043.76	1043.76	1043.76	1043.76			1043.76	1043.76	1043.76	1043.76	1043.76
		EnU EV batteryTotal and adittional Cu, EnU NEW cap+Mr (MJ/MW)	789736	545290	534513	520604	550797			789736	545290	534513	520604	550797			789736	545290	534513	520604	550797			789736	545290	534513	520604	550797			789736	545290	534513	520604	550797
		O&M (total in lifetime)	0	0	0	0	0			0	0	0	0	0			0	0	0	0	0			0	0	0	0	0			0	0	0	0	0
		Decommissioning (10% of Const) [11], EnU Decom (MJ/MW)	90973.6	66529	65451.3	64060.4	67079.7			90973.6	66529	65451.3	64060.4	67079.7			90973.6	66529	65451.3	64060.4	67079.7			90973.6	66529	65451.3	64060.4	67079.7			90973.6	66529	65451.3	64060.4	67079.7
		Transport of materials (GtoG+GtoE+D) [7],[12]-[14] (ESOIst) (MJ/MW)	34436.2	16866.8	16867	16693.6	23145.3			34436.2	16866.8	16867	16693.6	23145.3			34436.2	16866.8	16867	16693.6	23145.3			34436.2	16866.8	16867	16693.6	23145.3			34436.2	16866.8	16867	16693.6	23145.3
		Transport of materials (GtoG+GtoE+D) [7],[12]-[14] (ESOI final) (MJ/MW)	131441	96302	96302.5	95955.6	108859			131441	96302	96302.5	95955.6	108859			131441	96302	96302.5	95955.6	108859			131441	96302	96302.5	95955.6	108859			131441	96302	96302.5	95955.6	108859
		Lifetime (years)	10	10	10	10	10			10	10	10	10	10			10	10	10	10	10			10	10	10	10	10			10	10	10	10	10
		Total embodied energy, CradletoGrave (ESOIst) (MJ/MW)	915146	628686	616832	601358	641022			915146	628686	616832	601358	641022			915146	628686	616832	601358	641022			915146	628686	616832	601358	641022			915146	628686	616832	601358	641022
		Total embodied energy, CradletoGrave (ESOIfinal) (MJ/MW)	1.01215e+06	708122	696267	680620	726736			1.01215e+06	708122	696267	680620	726736			1.01215e+06	708122	696267	680620	726736			1.01215e+06	708122	696267	680620	726736			1.01215e+06	708122	696267	680620	726736
		CF (/1)	0.00489237	0.00489237	0.00489237	0.00489237	0.00489237			0.00489237	0.00489237	0.00489237	0.00489237	0.00489237			0.00489237	0.00489237	0.00489237	0.00489237	0.00489237			0.00489237	0.00489237	0.00489237	0.00489237	0.00489237			0.00489237	0.00489237	0.00489237	0.00489237	0.00489237
		Electricity self-consumption from grid (SC) (/1)	0	0	0	0	0			0	0	0	0	0			0	0	0	0	0			0	0	0	0	0			0	0	0	0	0
		Capacity power (MJ/(year*MW))	31536000	31536000	31536000	31536000	31536000			31536000	31536000	31536000	31536000	31536000			31536000	31536000	31536000	31536000	31536000			31536000	31536000	31536000	31536000	31536000			31536000	31536000	31536000	31536000	31536000
		EaB&E [15] (/1)	0.354446	0.354446	0.354446	0.354446	0.354446			0.454446	0.454446	0.454446	0.454446	0.454446			0.254446	0.254446	0.254446	0.254446	0.254446			0.354446	0.354446	0.354446	0.354446	0.354446			0.354446	0.354446	0.354446	0.354446	0.354446
		Total operational losses (OL) [10],[15] (/1)	0.0171696	0.0171696	0.0171696	0.0171696	0.0171696			0.0171696	0.0171696	0.0171696	0.0171696	0.0171696			0.0171696	0.0171696	0.0171696	0.0171696	0.0171696			0.0171696	0.0171696	0.0171696	0.0171696	0.0171696			0.0171696	0.0171696	0.0171696	0.0171696	0.0171696
		Charge losses ratio (CL) [15] (/1)	0.213155	0.213155	0.213155	0.213155	0.213155			0.213155	0.213155	0.213155	0.213155	0.213155			0.213155	0.213155	0.213155	0.213155	0.213155			0.313155	0.313155	0.313155	0.313155	0.313155			0.113155	0.113155	0.113155	0.113155	0.113155
		Energy delivered at consumer phase (MJ)	978897	978897	978897	978897	978897			827260	827260	827260	827260	827260			1.13053e+06	1.13053e+06	1.13053e+06	1.13053e+06	1.13053e+06			978897	978897	978897	978897	978897			978897	978897	978897	978897	978897
		Energy delivered at plant phase (MJ)	1.51637e+06	1.51637e+06	1.51637e+06	1.51637e+06	1.51637e+06			1.51637e+06	1.51637e+06	1.51637e+06	1.51637e+06	1.51637e+06			1.51637e+06	1.51637e+06	1.51637e+06	1.51637e+06	1.51637e+06			1.51637e+06	1.51637e+06	1.51637e+06	1.51637e+06	1.51637e+06			1.51637e+06	1.51637e+06	1.51637e+06	1.51637e+06	1.51637e+06
		Current grids (O&M) [6], EnU G&S (taking account scrap rate) (MJ/MW)	220165	220165	220165	220165	220165			220165	220165	220165	220165	220165			220165	220165	220165	220165	220165			220165	220165	220165	220165	220165			220165	220165	220165	220165	220165
		Machining rate of EV grids (15%) (MJ/MW)	29003.8	29003.8	29003.8	29003.8	29003.8			29003.8	29003.8	29003.8	29003.8	29003.8			29003.8	29003.8	29003.8	29003.8	29003.8			29003.8	29003.8	29003.8	29003.8	29003.8			29003.8	29003.8	29003.8	29003.8	29003.8
		ESOIst	2.24826	3.27267	3.33557	3.4214	3.2097			2.24826	3.27267	3.33557	3.4214	3.2097			2.24826	3.27267	3.33557	3.4214	3.2097			2.24826	3.27267	3.33557	3.4214	3.2097			2.24826	3.27267	3.33557	3.4214	3.2097
		ESOIfinal	0.781359	0.951546	0.959696	0.97067	0.939024			0.660322	0.804146	0.811034	0.820308	0.793564			0.902396	1.09895	1.10836	1.12103	1.08448			0.696997	0.829306	0.83549	0.843795	0.819779			0.888956	1.11605	1.12728	1.14245	1.09886
				Machining energy EV batteries 200MJ/kWh & Ea&ba +10% & CL +10%							Machining energy EV batteries 200MJ/kWh & Ea&ba -10% & CL +10%							Machining energy EV batteries 200MJ/kWh & Ea&ba +10% & CL -10%							Machining energy EV batteries 200MJ/kWh & Ea&ba -10% & CL -10%
		EnU from Materials (MJ/MW)	607902	385679	375881	363237	390685			607902	385679	375881	363237	390685			607902	385679	375881	363237	390685			607902	385679	375881	363237	390685
		EnU taking account scrap rate (10%) (MJ/MW)	668692	424247	413470	399561	429753			668692	424247	413470	399561	429753			668692	424247	413470	399561	429753			668692	424247	413470	399561	429753
		Machining energy of EV Batteries (MJ/MW)	120000	120000	120000	120000	120000			120000	120000	120000	120000	120000			120000	120000	120000	120000	120000			120000	120000	120000	120000	120000
		Machining rate of adittional Cu(15%) (MJ/MW)	1043.76	1043.76	1043.76	1043.76	1043.76			1043.76	1043.76	1043.76	1043.76	1043.76			1043.76	1043.76	1043.76	1043.76	1043.76			1043.76	1043.76	1043.76	1043.76	1043.76
		EnU EV batteryTotal and adittional Cu, EnU NEW cap+Mr (MJ/MW)	789736	545290	534513	520604	550797			789736	545290	534513	520604	550797			789736	545290	534513	520604	550797			789736	545290	534513	520604	550797
		O&M (total in lifetime)	0	0	0	0	0			0	0	0	0	0			0	0	0	0	0			0	0	0	0	0
		Decommissioning (10% of Const) [11], EnU Decom (MJ/MW)	90973.6	66529	65451.3	64060.4	67079.7			90973.6	66529	65451.3	64060.4	67079.7			90973.6	66529	65451.3	64060.4	67079.7			90973.6	66529	65451.3	64060.4	67079.7
		Transport of materials (GtoG+GtoE+D) [7],[12]-[14] (ESOIst) (MJ/MW)	34436.2	16866.8	16867	16693.6	23145.3			34436.2	16866.8	16867	16693.6	23145.3			34436.2	16866.8	16867	16693.6	23145.3			34436.2	16866.8	16867	16693.6	23145.3
		Transport of materials (GtoG+GtoE+D) [7],[12]-[14] (ESOI final) (MJ/MW)	131441	96302	96302.5	95955.6	108859			131441	96302	96302.5	95955.6	108859			131441	96302	96302.5	95955.6	108859			131441	96302	96302.5	95955.6	108859
		Lifetime (years)	10	10	10	10	10			10	10	10	10	10			10	10	10	10	10			10	10	10	10	10
		Total embodied energy, CradletoGrave (ESOIst) (MJ/MW)	915146	628686	616832	601358	641022			915146	628686	616832	601358	641022			915146	628686	616832	601358	641022			915146	628686	616832	601358	641022
		Total embodied energy, CradletoGrave (ESOIfinal) (MJ/MW)	1.01215e+06	708122	696267	680620	726736			1.01215e+06	708122	696267	680620	726736			1.01215e+06	708122	696267	680620	726736			1.01215e+06	708122	696267	680620	726736
		CF (/1)	0.00489237	0.00489237	0.00489237	0.00489237	0.00489237			0.00489237	0.00489237	0.00489237	0.00489237	0.00489237			0.00489237	0.00489237	0.00489237	0.00489237	0.00489237			0.00489237	0.00489237	0.00489237	0.00489237	0.00489237
		Electricity self-consumption from grid (SC) (/1)	0	0	0	0	0			0	0	0	0	0			0	0	0	0	0			0	0	0	0	0
		Capacity power (MJ/(year*MW))	31536000	31536000	31536000	31536000	31536000			31536000	31536000	31536000	31536000	31536000			31536000	31536000	31536000	31536000	31536000			31536000	31536000	31536000	31536000	31536000
		EaB&E [15] (/1)	0.454446	0.454446	0.454446	0.454446	0.454446			0.254446	0.254446	0.254446	0.254446	0.254446			0.454446	0.454446	0.454446	0.454446	0.454446			0.254446	0.254446	0.254446	0.254446	0.254446
		Total operational losses (OL) [10],[15] (/1)	0.0171696	0.0171696	0.0171696	0.0171696	0.0171696			0.0171696	0.0171696	0.0171696	0.0171696	0.0171696			0.0171696	0.0171696	0.0171696	0.0171696	0.0171696			0.0171696	0.0171696	0.0171696	0.0171696	0.0171696
		Charge losses ratio (CL) [15] (/1)	0.313155	0.313155	0.313155	0.313155	0.313155			0.313155	0.313155	0.313155	0.313155	0.313155			0.113155	0.113155	0.113155	0.113155	0.113155			0.113155	0.113155	0.113155	0.113155	0.113155
		Energy delivered at consumer phase (MJ)	827260	827260	827260	827260	827260			1.13053e+06	1.13053e+06	1.13053e+06	1.13053e+06	1.13053e+06			827260	827260	827260	827260	827260			1.13053e+06	1.13053e+06	1.13053e+06	1.13053e+06	1.13053e+06
		Energy delivered at plant phase (MJ)	1.51637e+06	1.51637e+06	1.51637e+06	1.51637e+06	1.51637e+06			1.51637e+06	1.51637e+06	1.51637e+06	1.51637e+06	1.51637e+06			1.51637e+06	1.51637e+06	1.51637e+06	1.51637e+06	1.51637e+06			1.51637e+06	1.51637e+06	1.51637e+06	1.51637e+06	1.51637e+06
		Current grids (O&M) [6], EnU G&S (taking account scrap rate) (MJ/MW)	220165	220165	220165	220165	220165			220165	220165	220165	220165	220165			220165	220165	220165	220165	220165			220165	220165	220165	220165	220165
		Machining rate of EV grids (15%) (MJ/MW)	29003.8	29003.8	29003.8	29003.8	29003.8			29003.8	29003.8	29003.8	29003.8	29003.8			29003.8	29003.8	29003.8	29003.8	29003.8			29003.8	29003.8	29003.8	29003.8	29003.8
		ESOIst	2.24826	3.27267	3.33557	3.4214	3.2097			2.24826	3.27267	3.33557	3.4214	3.2097			2.24826	3.27267	3.33557	3.4214	3.2097			2.24826	3.27267	3.33557	3.4214	3.2097
		ESOIfinal	0.589028	0.700842	0.706068	0.713087	0.69279			0.804966	0.957771	0.964913	0.974504	0.946767			0.751251	0.943169	0.952658	0.96548	0.928645			1.02666	1.28893	1.3019	1.31942	1.26909
References
[1] https://www.hyundai.com/es/modelos/nuevo-ioniq-electrico/autonomia.html
[2] https://www.hyundai.com/es/modelos/kona-electrico/autonomia.html
[3] https://www.evspecifications.com/en/model/d323ad
[4] RENAULT, «Renault ZOE data». https://www.renault.co.uk/electric-vehicles/zoe.html
[5] https://www.volkswagen.es/es/modelos/id3.html
[6] A. Lucas, C. Alexandra Silva, y R. Costa Neto, «Life cycle analysis of energy supply infrastructure for conventional and electric vehicles», Energy Policy, vol. 41, pp. 537-547, feb. 2012, doi: 10.1016/j.enpol.2011.11.015.
[7] C. de Castro y I. Capellán-Pérez, «Standard, Point of Use, and Extended Energy Return on Energy Invested (ESOI) from Comprehensive Material Requirements of Present Global Wind, Solar, and Hydro Power Technologies», Energies, vol. 13, n.o 12, p. 3036, jun. 2020, doi: 10.3390/en13123036.
[8] Volkswagen, «Warranty - Terms and Conditions». https://www.volkswagen.co.uk/owners-and-drivers/my-car/warranties/new-car-terms
[9] Hyundai, «Hyundai 5 Year Warranty Terms and Conditions». [En línea]. Disponible en: https://www.hyundai.co.uk/5-year-warranty/5_year_warranty-terms-and-conditions.pdf
[10] https://www.geotab.com/fleet-management-solutions/ev-battery-degradation-tool/
[11] E. G. Hertwich et al., «Integrated life-cycle assessment of electricity-supply scenarios confirms global environmental benefit of low-carbon technologies», Proc. Natl. Acad. Sci., vol. 112, n.o 20, pp. 6277-6282, may 2015, doi: 10.1073/pnas.1312753111.
[12] M. Schmied y W. Knörr, «Calculating GHG emissions for freight forwarding and logistics services in accordance with EN 16258». 2012. [En línea]. Disponible en: https://www.clecat.org/media/CLECAT_Guide_on_Calculating_GHG_emissions_for_freight_forwarding_and_logistics_services.pdf
[13] Z. Kis, N. Pandya, y R. H. E. M. Koppelaar, «Electricity generation technologies: Comparison of materials use, energy return on investment, jobs creation and CO2 emissions reduction», Energy Policy, vol. 120, pp. 144-157, sep. 2018, doi: 10.1016/j.enpol.2018.05.033
[14] S. Teske, Achieving the paris climate agreement goals: global and regional 100% renewable energy scenarios with non-energy GHG pathways for +1.5c and +2c. New York, NY: Springer Berlin Heidelberg, 2018.
[15] A. D. Duce et al., «eLCAr: Guidelines for the LCA of electric vehicles», 2013, doi: 10.13140/RG.2.1.2782.8244.
[16] J.Porzio et al. Life‐Cycle Assessment Considerations for Batteries and Battery Materials (2021) DOI:10.1002/aenm.202100771
[truncated: 2 more columns]

[truncated: 2 more sheets: ESOIdynamic, Material Requeriments]
